# Supplementary material
Source: HighWire-hosted journal article supplement (https://www.cmaj.ca/highwire/filestream/75704/field_highwire_adjunct_files/1/200920-res-2-at.pdf)
Supplement: 200920-res-2-at.pdf [file 200920-res-2-at.pdf]

## **Appendix 2 (as supplied by the authors)**

### **Impact of Climate and Public Health Interventions on the COVID-19 Pandemic: Prospective Cohort Study**

Peter Jüni, Martina Rothenbühler, Pavlos Bobos, Kevin E. Thorpe, Bruno R. da Costa, David N. Fisman, Arthur S. Slutsky, Dionne Gesink

## Table of Contents

|      |                                                                                                                         |    |
|------|-------------------------------------------------------------------------------------------------------------------------|----|
| I.   | Supplementary Methods .....                                                                                             | 3  |
| II.  | Supplementary Tables .....                                                                                              | 7  |
|      | Table S1. Data sources and explanations of outcome, exposure variables and covariates .....                             | 7  |
|      | Table S2. Pre-specified prioritization of variables for parsimonious multivariable model .....                          | 9  |
|      | Table S3. List of included geopolitical areas.....                                                                      | 10 |
|      | Table S4. Association of epidemic growth with latitude .....                                                            | 14 |
|      | Table S5. Association of epidemic growth with temperature .....                                                         | 15 |
|      | Table S6. Association of epidemic growth with absolute humidity .....                                                   | 16 |
|      | Table S7. Association of epidemic growth with relative humidity .....                                                   | 17 |
|      | Table S8. Association of epidemic growth with restrictions of mass gatherings .....                                     | 18 |
|      | Table S9. Association of epidemic growth with school closures .....                                                     | 19 |
|      | Table S10. Association of epidemic growth with measures of social distancing .....                                      | 20 |
|      | Table S11. Association of epidemic growth with composite of any public health intervention .....                        | 21 |
|      | Table S12. Association of epidemic growth with number of public health interventions .....                              | 22 |
|      | Table S13. Post-hoc use of alternative outcome definition to measure epidemic growth: univariate analyses .....         | 23 |
|      | Table S14. Post-hoc use of alternative outcome definition to measure epidemic growth: multivariable analysis .....      | 24 |
|      | Table S15. Bias domains for association of epidemic growth with square of the latitude .....                            | 25 |
|      | Table S16. Bias domains for association of epidemic growth with temperature .....                                       | 26 |
|      | Table S17. Bias domains for association of epidemic growth with relative humidity.....                                  | 27 |
|      | Table S18. Bias domains for association of epidemic growth with absolute humidity.....                                  | 28 |
|      | Table S19. Bias domains for association of epidemic growth with composite of any public health intervention.....        | 29 |
|      | Table S20. Bias domains for association of epidemic growth with restriction of mass gatherings .....                    | 30 |
|      | Table S21. Bias domains for association of epidemic growth with social distancing.....                                  | 32 |
|      | Table S22. Bias domains for association of epidemic growth with school closures.....                                    | 34 |
|      | Table S23. Bias domains for association of epidemic growth with number of implemented public health interventions ..... | 36 |
| III. | Supplementary Figures .....                                                                                             | 37 |
|      | Figure S1. Calculation of rate ratios .....                                                                             | 37 |
|      | Figure S2. Cluster analysis .....                                                                                       | 38 |
|      | Figure S3. Flowchart .....                                                                                              | 39 |
|      | Figure S4. Scatter plot of temperature against latitude.....                                                            | 40 |
|      | Figure S5. Scatter plot of absolute humidity against latitude .....                                                     | 41 |
|      | Figure S6. Scatter plot of relative humidity against latitude.....                                                      | 42 |
|      | Figure S7. Bubble plot of epidemic growth against latitude .....                                                        | 43 |
|      | Figure S8. Bubble plot of epidemic growth against temperature .....                                                     | 44 |
|      | Figure S9. Bubble plot of epidemic growth against relative humidity .....                                               | 45 |
|      | Figure S10. Bubble plot of epidemic growth against absolute humidity .....                                              | 46 |
|      | Figure S11. Bubble plot of epidemic growth by restrictions of mass gatherings (no/yes) .....                            | 47 |
|      | Figure S12. Bubble plot of epidemic growth by school closures (no/yes) .....                                            | 48 |
|      | Figure S13. Bubble plot of epidemic growth by measures of social distancing (no/yes).....                               | 49 |
|      | Figure S14. Multivariable model after stepwise backward selection of covariates.....                                    | 50 |
|      | Figure S15. Risk of bias summary table for evaluated exposure variables .....                                           | 51 |
| IV.  | Supplementary References .....                                                                                          | 52 |

## I. Supplementary Methods

### *Outcome*

Due to considerable differences in testing practices between different geopolitical areas, the actual rates of COVID-19 cases cannot be reliably estimated; however, rate ratios based on cumulative counts reported at two timepoints one week apart can be reliably estimated since testing practices in a specific geopolitical area will affect both counts in the same way during the ascertained one-week period. The time window of one week is short enough that no substantial changes in testing strategy are expected in most geopolitical areas so that the reported confirmed cases in each region represent a constant percentage of the true actual cases. We emphasize that testing strategies affect estimates of rates considerably more than the ratio.

The rate ratio used as a measure of epidemic growth was calculated as the cumulative count of confirmed cases since the beginning of the epidemic as of March 27 divided by the cumulative count of confirmed cases since the beginning of the epidemic as of March 20 (Figure S1). The observation time was identical across all areas. Since the populations in question were large, they could be considered equal at both times and cancelled out in calculations of rate ratios. A rate ratio of 2 indicates that the cumulative number of cases in a geopolitical area doubled within one week, a rate ratio of 3 indicates that it tripled.

The  $\log(\text{rate ratio})$  is equivalent to estimating the slope of  $\log(\text{count})$  over time – the slope of the log cumulative frequency curve – which estimates the logarithm of the exponential growth rate, hence the rate ratio is the estimate of the exponential growth parameter.

### *Univariate and multivariable models*

The protocol prespecified the following analyses of the association of exposure variables with epidemic growth:

#### *No adjustment:*

Univariate random-effects regression with inverse-variance weights regressing the log rate ratio against exposure variables.

#### *Adjusted for geographical regions:*

Bivariable random-effects regression with inverse-variance weights regressing the log rate ratio against exposure variables after inclusion of major geographical area as categorical covariate.

#### *Adjusted for prespecified covariates:*

Multivariable random-effects regression with inverse-variance weights regressing the log rate ratio against exposure variables after inclusion of the following 8 prespecified covariates: gross domestic product (GDP) per capita, health expenditure as percent of GDP, life expectancy, percentage of inhabitants aged 65 or over, Infectious Disease Vulnerability Index, urban population density, number of flight passengers per capita, closest distance to a geopolitical area with an already established epidemic

(City of Wuhan, South Korea, Iran, Italy). For the analysis of latitude, we also included altitude as covariate.

*Adjusted for geographical regions and prespecified covariates:*

Multivariable random-effects regression with inverse-variance weights regressing the log rate ratio against exposure variables after inclusion of the prespecified covariates above and major geographical area as categorical covariate.

*Adjusted for geographical regions, prespecified covariates and public health interventions:*

Multivariable random-effects regression with inverse-variance weights regressing the log rate ratio against temperature or humidity after inclusion of the prespecified covariates above, major geographical area as categorical covariate, and school closures, restrictions of mass gatherings, and measures of social distancing as binary covariates.

*Adjusted for geographical regions, prespecified covariates, temperature and humidity:*

Multivariable random-effects regression with inverse-variance weights regressing the log rate ratio against public health interventions after inclusion of the prespecified covariates above, major geographical area as categorical covariate, and temperature and humidity as continuous covariates.

*Analysis sets*

The protocol pre-specified that all analyses above would be performed in the following 3 datasets:

- All geopolitical areas (main analysis set)
- Geopolitical areas with  $\geq 20$  events on March 20, 2020
- High income countries

*Bonferroni correction for analysis of primary exposure variable*

A Bonferroni correction was specified for the analysis of the primary exposure variable (the square of geographic latitude), with alpha set to 0.025 (0.05/2) for the univariate and the multivariable model adjusted for prespecified covariates.

*Parsimonious models*

Two parsimonious multivariable models were developed in the absence of knowledge of results of univariate or multivariable analyses above.

For Model 1, we first prioritized covariates on theoretical grounds (see Table S10) and then used unsupervised cluster analysis to identify clusters of variables based on Spearman's  $\rho^2$ . Cluster analysis indicated clustering of the three public health interventions (see Figure S1). We therefore derived a post-hoc composite of exposure to any public health intervention. In addition, we pre-specified to perform tests for trend according to the number of public health interventions implemented (0, 1, or 2

or more) under the assumption that the RRRs for the association of epidemic growth with school closures, restrictions of mass gatherings or measures of social distancing would have the same direction and a similar magnitude. Model 1 included absolute humidity, urban population density, GDP, health expenditure as percentage of GDP, number of public health interventions, major geographical regions, and closest distance to a geopolitical area with an already established epidemic as independent variables.

For Model 2, we used stepwise backward selection of covariates. Starting with the full model, variables were step wisely removed based on the adjusted R<sup>2</sup> statistic. A variable was removed if its removal resulted in an identical or increased adjusted R<sup>2</sup>.

We pre-specified that Model 1 would take precedence over Model 2, as it would not be at risk of overfitting and forced major geographical regions (Asia, Oceania, Europe, Africa, Americas) into both models to account for the geographic progression of the pandemic over time.

#### *Post-hoc use of an alternative outcome definition to measure epidemic growth*

In response to a peer reviewer's comment, we performed post hoc sensitivity analyses using the univariate and the parsimonious multivariable model with the log(rate ratio) of the cumulative incidence of confirmed COVID-19 cases that occurred during the follow-up period (March 21 to 27, 2020) divided by the cumulative incidence of confirmed COVID-19 cases that occurred during the exposure period (March 7 to 13, 2020) as dependent variable (see Figure 1 in main text for explanation of exposure and follow-up periods). Results are presented in Tables S12 and S13.

#### *Bubble plots*

We constructed bubble plots of the rate ratio of COVID-19 on a logarithmic scale on the y-axis against exposure variables on the x-axis; the size of bubbles is proportional to the weight of the geopolitical area in weighted random-effects regression. We superimposed prediction lines and 95% confidence bands for the univariate association with epidemic growth for continuous, and box and whisker plots for categorical exposure variables.

#### *Use of ROBINS-I and ROBINS-E to judge risk of bias for individual associations*

In response to a peer reviewer's comment, we used the Risk Of Bias In Non-randomized Studies of Interventions (ROBINS-I) and the Risk Of Bias In Non-randomized Studies of Exposures (ROBINS-E) tools<sup>1,2</sup> to judge the risk of bias for the analyzed associations of epidemic growth with prespecified exposure variables.

We concluded that the risk of bias was low for latitude, temperature, the composite of any public health intervention and for the number of public health interventions, but moderate for the remaining 5 exposure variables. The overall risk of bias was judged to be moderate for relative and absolute humidity because of a moderate risk of bias due to confounding (either direction) and due to non-differential misclassification (bias towards the null). The overall risk of bias was judged to be moderate for each of three individual public health interventions due to confounding with other public health interventions (more likely away from the null). Detailed explanations of judgments are listed in Tables S14 to S22, a summary is provided in Figure S15.

### *Rationale and summary of protocol changes*

An initial analysis was performed on March 8, 2020 according to the original version of the protocol (version 1.0), including 73 geopolitical areas with 5,569 cases. In the univariate analysis, we found a strong association of epidemic growth with the square of the latitude, with temperature, and with absolute humidity, but closer inspection of the data suggested implausible outliers explained by liberal eligibility criteria, which could have biased estimates of associations. We therefore refrained from making the results publicly available and revised the study protocol on March 15, 2020 (version 1.1) to include more stringent inclusion criteria for geopolitical areas of at least 10 accumulated cases per geopolitical area and documented local transmission at baseline according to the WHO's Situation Reports, and to await the accumulation of more cases.

After the first revision of the protocol, investigators reached consensus that the time lag reflecting the time between transmission of SARS-CoV-2 and reporting of confirmed COVID-19 cases should be set to 14 days. We therefore moved the follow-up period forward by 6 days to March 21 to March 27, 2020. In addition, we decided to collect data on school closures, restriction of mass gatherings, and measures of social distancing at the level of geopolitical areas (version 1.2).

Revisions of the protocol were done before completion of follow-up, without inspection of the data except for results of the initial analysis done on March 8, 2020 (see Protocol version 1.2 for a summary of results of the initial analysis).

## II. Supplementary Tables

**Table S1. Data sources and explanations of outcome, exposure variables and covariates**

| Variable                               | Explanation                                                                                                           | Data sources                                                                                                               |
|----------------------------------------|-----------------------------------------------------------------------------------------------------------------------|----------------------------------------------------------------------------------------------------------------------------|
| Epidemic growth                        | Rate ratio of cumulative incidence on March 27 divided by cumulative incidence on March 20, 2020                      | Online interactive dashboard, Center for Systems Science and Engineering, Johns Hopkins University, Baltimore <sup>3</sup> |
| Square of latitude                     | On causal pathway for temperature and absolute humidity                                                               | Derived from coordinates of capital of geopolitical area                                                                   |
| Temperature                            | Potential association with SARS-CoV-2 transmission                                                                    | Meteorological website, <sup>4</sup> determined for capital of geopolitical area                                           |
| Relative humidity                      | Potential association with SARS-CoV-2 transmission                                                                    | Meteorological website, <sup>4</sup> determined for capital of geopolitical area                                           |
| Absolute humidity                      | Potential association with SARS-CoV-2 transmission                                                                    | Calculated from temperature and relative humidity <sup>5</sup> for capital of geopolitical area                            |
| Restriction of mass gatherings         | Potential association with SARS-CoV-2 transmission                                                                    | Provisions and press releases of administrative and governmental bodies; newspaper articles                                |
| School closures                        | Potential association with SARS-CoV-2 transmission                                                                    | COVID-19 Educational Disruption and Response, UNESCO; <sup>6</sup> official school schedules for school holidays           |
| Social distancing                      | Potential association with SARS-CoV-2 transmission                                                                    | Provisions and press releases of administrative and governmental bodies; newspaper articles                                |
| GDP                                    | Potential association with testing capacity of healthcare system                                                      | World Bank <sup>7</sup>                                                                                                    |
| Health expenditure                     | Potential association with testing capacity of healthcare system                                                      | World Bank <sup>7</sup>                                                                                                    |
| Life expectancy                        | General health indicator; potential association with SARS-CoV-2 transmission, disease severity or mortality           | World Bank <sup>7</sup>                                                                                                    |
| Percentage aged ≥65 years              | General demographic indicator; potential association with risk of asymptomatic disease, disease severity or mortality | World Bank <sup>7</sup>                                                                                                    |
| Infectious Disease Vulnerability Index | Potential association with testing capacity of healthcare system                                                      | RAND Corporation <sup>8</sup>                                                                                              |
| Urban population density               | Potential association with SARS-CoV-2 transmission                                                                    | Demographia World Urban Areas; <sup>9</sup> United States Census <sup>10</sup>                                             |

|                                          |                                                                                           |                                                                                                                                            |
|------------------------------------------|-------------------------------------------------------------------------------------------|--------------------------------------------------------------------------------------------------------------------------------------------|
| Flight passengers per capita             | Potential association with initial attack rate                                            | CAPA Centre of Aviation; <sup>11</sup> Annual World Airport Traffic Report; <sup>12</sup> US Federal Aviation Administration <sup>13</sup> |
| Closest distance to established epidemic | Potential association with initial attack rate and alertness of health care system        | Calculated from coordinates of capital of geopolitical area                                                                                |
| Altitude                                 | On causal pathway for temperature, relative and absolute humidity                         | Derived from coordinates of capital of geopolitical area                                                                                   |
| Major geographical region                | Accounts for the geographic progression of pandemic from continent to continent over time | Calculated from coordinates                                                                                                                |

---



**Table S2. Pre-specified prioritization of variables for parsimonious multivariable model**

| Variable                                 | Potentially directly associated with |           | Priority | Comment                                                   |
|------------------------------------------|--------------------------------------|-----------|----------|-----------------------------------------------------------|
|                                          | Transmission                         | Detection |          |                                                           |
| Latitude <sup>2</sup>                    | No                                   | No        | 3        | On causal pathway for temperature and absolute humidity   |
| Temperature                              | Yes                                  | No        | 1        |                                                           |
| Rel. humidity                            | Yes                                  | No        | 1        |                                                           |
| Abs. humidity                            | Yes                                  | No        | 1        |                                                           |
| Restriction of gatherings                | Yes                                  | No        | 1        |                                                           |
| School closures                          | Yes                                  | No        | 1        |                                                           |
| Social distancing                        | Yes                                  | No        | 1        | Low number of areas with implementation                   |
| GDP                                      | No                                   | Yes       | 1        | Associated with testing capacity of healthcare system     |
| Health expenditure                       | No                                   | Yes       | 1        | Associated with testing capacity of healthcare system     |
| Life expectancy                          | No                                   | No        | 2        | General health indicator                                  |
| Percentage aged ≥65 years                | No                                   | No        | 2        | General demographic indicator                             |
| Infectious Disease Vulnerability Index   | No                                   | Yes       | 1        | Associated with testing capacity of healthcare system     |
| Urban population density                 | Yes                                  | No        | 1        |                                                           |
| Flight passengers per capita             | Yes                                  | No        | 2        | Current situation after start of pandemic not reflected   |
| Closest distance to established epidemic | Yes                                  | Yes       | 1        | Associated with attack rate and alertness of system       |
| Altitude                                 | No                                   | No        | 3        | On causal pathway for temperature, rel. and abs. humidity |
| Geographical region                      | Yes                                  | Yes       | 1        | Accounts for the geographic progression of the pandemic   |

**Table S3. List of included geopolitical areas**

| Country                          | Country code | Region            | Region code |
|----------------------------------|--------------|-------------------|-------------|
| Albania                          | ALB          |                   |             |
| Algeria                          | DZA          |                   |             |
| Argentina                        | ARG          |                   |             |
| Armenia                          | ARM          |                   |             |
| Australia                        | AUS          | New South Wales   | NSW         |
| Australia                        | AUS          | Queensland        | QLD         |
| Australia                        | AUS          | South Australia   | SA          |
| Australia                        | AUS          | Victoria          | VIC         |
| Australia                        | AUS          | Western Australia | WA          |
| Austria                          | AUT          |                   |             |
| Bahrain                          | BHR          |                   |             |
| Bangladesh                       | BGD          |                   |             |
| Belarus                          | BLR          |                   |             |
| Belgium                          | BEL          |                   |             |
| Bolivia                          | BOL          |                   |             |
| Bosnia and Herzegovina           | BIH          |                   |             |
| Brazil                           | BRA          |                   |             |
| Brunei                           | BRN          |                   |             |
| Bulgaria                         | BGR          |                   |             |
| Burkina Faso                     | BFA          |                   |             |
| Cambodia                         | KHM          |                   |             |
| Cameroon                         | CMR          |                   |             |
| Canada                           | CAN          | Alberta           | AB          |
| Canada                           | CAN          | British Columbia  | BC          |
| Canada                           | CAN          | New Brunswick     | NB          |
| Canada                           | CAN          | Ontario           | ON          |
| Canada                           | CAN          | Quebec            | QC          |
| Canada                           | CAN          | Saskatchewan      | SK          |
| Chile                            | CHL          |                   |             |
| Colombia                         | COL          |                   |             |
| Costa Rica                       | CRI          |                   |             |
| Croatia                          | HRV          |                   |             |
| Cyprus                           | CYP          |                   |             |
| Czechia                          | CZE          |                   |             |
| Democratic Republic of the Congo | COD          |                   |             |
| Denmark                          | DNK          |                   |             |
| Dominican Republic               | DOM          |                   |             |
| Ecuador                          | ECU          |                   |             |
| Egypt                            | EGY          |                   |             |
| Estonia                          | EST          |                   |             |

|                 |     |
|-----------------|-----|
| Faroe Islands   | FRO |
| Finland         | FIN |
| France          | FRA |
| French Guiana   | GUF |
| Germany         | DEU |
| Ghana           | GHA |
| Greece          | GRC |
| Hong Kong       | HKG |
| Hungary         | HUN |
| Iceland         | ISL |
| India           | IND |
| Indonesia       | IDN |
| Iraq            | IRQ |
| Ireland         | IRL |
| Israel          | ISR |
| Jamaica         | JAM |
| Japan           | JPN |
| Kuwait          | KWT |
| Lebanon         | LBN |
| Luxembourg      | LUX |
| Macao           | MAC |
| Malaysia        | MYS |
| Maldives        | MDV |
| Moldova         | MDA |
| Morocco         | MAR |
| Netherlands     | NLD |
| New Zealand     | NZL |
| North Macedonia | MKD |
| Norway          | NOR |
| Oman            | OMN |
| Pakistan        | PAK |
| Panama          | PAN |
| Paraguay        | PRY |
| Peru            | PER |
| Philippines     | PHL |
| Poland          | POL |
| Portugal        | PRT |
| Qatar           | QAT |
| Romania         | ROU |
| Russia          | RUS |
| San Marino      | SMR |
| Saudi Arabia    | SAU |
| Senegal         | SEN |

|                      |     |                      |    |
|----------------------|-----|----------------------|----|
| Serbia               | SRB |                      |    |
| Singapore            | SGP |                      |    |
| Slovakia             | SVK |                      |    |
| Slovenia             | SVN |                      |    |
| South Africa         | ZAF |                      |    |
| Spain                | ESP |                      |    |
| Sri Lanka            | LKA |                      |    |
| Sweden               | SWE |                      |    |
| Switzerland          | CHE |                      |    |
| Taiwan               | TWN |                      |    |
| Thailand             | THA |                      |    |
| Tunisia              | TUN |                      |    |
| Turkey               | TUR |                      |    |
| Ukraine              | UKR |                      |    |
| United Arab Emirates | ARE |                      |    |
| United Kingdom       | GBR |                      |    |
| United States        | USA | Arkansas             | AR |
| United States        | USA | Arizona              | AZ |
| United States        | USA | California           | CA |
| United States        | USA | Colorado             | CO |
| United States        | USA | Connecticut          | CT |
| United States        | USA | District of Columbia | DC |
| United States        | USA | Florida              | FL |
| United States        | USA | Georgia              | GA |
| United States        | USA | Hawaii               | HI |
| United States        | USA | Iowa                 | IA |
| United States        | USA | Illinois             | IL |
| United States        | USA | Indiana              | IN |
| United States        | USA | Kansas               | KS |
| United States        | USA | Kentucky             | KY |
| United States        | USA | Louisiana            | LA |
| United States        | USA | Massachusetts        | MA |
| United States        | USA | Maryland             | MD |
| United States        | USA | Maine                | ME |
| United States        | USA | Michigan             | MI |
| United States        | USA | Minnesota            | MN |
| United States        | USA | Mississippi          | MS |
| United States        | USA | North Carolina       | NC |
| United States        | USA | North Dakota         | ND |
| United States        | USA | Nebraska             | NE |
| United States        | USA | New Hampshire        | NH |
| United States        | USA | New Jersey           | NJ |
| United States        | USA | New Mexico           | NM |

|               |     |                |    |
|---------------|-----|----------------|----|
| United States | USA | Nevada         | NV |
| United States | USA | New York       | NY |
| United States | USA | Ohio           | OH |
| United States | USA | Oklahoma       | OK |
| United States | USA | Oregon         | OR |
| United States | USA | Pennsylvania   | PA |
| United States | USA | Rhode Island   | RI |
| United States | USA | South Carolina | SC |
| United States | USA | South Dakota   | SD |
| United States | USA | Tennessee      | TN |
| United States | USA | Texas          | TX |
| United States | USA | Utah           | UT |
| United States | USA | Virginia       | VA |
| United States | USA | Washington     | WA |
| United States | USA | Wisconsin      | WI |
| United States | USA | Wyoming        | WY |
| Uzbekistan    | UZB |                |    |
| Vietnam       | VNM |                |    |

---

**Table S4. Association of epidemic growth with latitude**

| <i>Latitude (per 400 degrees<sup>2</sup>)</i>                                              | Ratio of rate ratios (95% CI) | P value |
|--------------------------------------------------------------------------------------------|-------------------------------|---------|
| No adjustment                                                                              |                               |         |
| All areas                                                                                  | 0.99 (0.96 to 1.03)           | 0.72    |
| Areas with $\geq 20$ events                                                                | 0.99 (0.95 to 1.02)           | 0.54    |
| High income countries                                                                      | 0.98 (0.93 to 1.02)           | 0.26    |
| Adjusted for geographical regions                                                          |                               |         |
| All areas                                                                                  | 1.01 (0.97 to 1.05)           | 0.62    |
| Areas with $\geq 20$ events                                                                | 1.00 (0.96 to 1.05)           | 0.90    |
| High income countries                                                                      | 0.98 (0.93 to 1.02)           | 0.30    |
| Adjusted for prespecified covariates                                                       |                               |         |
| All areas                                                                                  | 1.00 (0.96 to 1.05)           | 0.83    |
| Areas with $\geq 20$ events                                                                | 1.01 (0.97 to 1.05)           | 0.75    |
| High income countries                                                                      | 0.99 (0.95 to 1.04)           | 0.77    |
| Adjusted for geographical regions and prespecified covariates                              |                               |         |
| All areas                                                                                  | 1.01 (0.96 to 1.06)           | 0.75    |
| Areas with $\geq 20$ events                                                                | 1.01 (0.96 to 1.06)           | 0.82    |
| High income countries                                                                      | 0.98 (0.92 to 1.03)           | 0.42    |
| Adjusted for geographical regions, prespecified covariates and public health interventions |                               |         |
| All areas                                                                                  | 1.00 (0.96 to 1.05)           | 0.94    |
| Areas with $\geq 20$ events                                                                | 1.00 (0.95 to 1.05)           | 0.97    |
| High income countries                                                                      | 0.98 (0.93 to 1.03)           | 0.46    |

Epidemic growth quantified by the rate ratio comparing the cumulative rate on March 27 with the cumulative rate on March 20, 2020; Ratio of rate ratios expressed per increase in 400 degrees<sup>2</sup> of latitude. CI, confidence interval; p values are 2-sided. 132 geopolitical areas were included in the analysis of areas with  $\geq 20$  events, and 98 areas were included in the analysis restricted to high income countries.

**Table S5. Association of epidemic growth with temperature**

| <i>Temperature (per 5°C)</i>                                                               | Ratio of Rate ratios (95% CI) | P value |
|--------------------------------------------------------------------------------------------|-------------------------------|---------|
| No adjustment                                                                              |                               |         |
| All areas                                                                                  | 0.97 (0.93 to 1.02)           | 0.21    |
| Areas with ≥20 events                                                                      | 0.97 (0.92 to 1.02)           | 0.28    |
| High income countries                                                                      | 0.97 (0.91 to 1.03)           | 0.31    |
| Adjusted for geographical regions                                                          |                               |         |
| All areas                                                                                  | 0.98 (0.93 to 1.03)           | 0.43    |
| Areas with ≥20 events                                                                      | 0.99 (0.94 to 1.04)           | 0.63    |
| High income countries                                                                      | 1.01 (0.95 to 1.07)           | 0.70    |
| Adjusted for prespecified covariates                                                       |                               |         |
| All areas                                                                                  | 0.97 (0.92 to 1.03)           | 0.31    |
| Areas with ≥20 events                                                                      | 0.97 (0.92 to 1.03)           | 0.29    |
| High income countries                                                                      | 0.99 (0.93 to 1.05)           | 0.73    |
| Adjusted for geographical regions and prespecified covariates                              |                               |         |
| All areas                                                                                  | 0.99 (0.93 to 1.05)           | 0.72    |
| Areas with ≥20 events                                                                      | 0.99 (0.93 to 1.06)           | 0.81    |
| High income countries                                                                      | 1.01 (0.94 to 1.09)           | 0.80    |
| Adjusted for geographical regions, prespecified covariates and public health interventions |                               |         |
| All areas                                                                                  | 1.00 (0.94 to 1.06)           | 0.88    |
| Areas with ≥20 events                                                                      | 1.00 (0.94 to 1.06)           | 0.96    |
| High income countries                                                                      | 1.00 (0.93 to 1.07)           | 0.95    |

Epidemic growth quantified by the rate ratio comparing the cumulative rate on March 27 with the cumulative rate on March 20, 2020; Ratio of rate ratios expressed per 5°C increase in temperature. CI, confidence interval; p values are 2-sided. 132 geopolitical areas were included in the analysis of areas with ≥20 events, and 98 areas were included in the analysis restricted to high income countries.

**Table S6. Association of epidemic growth with absolute humidity**

| <i>Absolute humidity (per 5 g/m<sup>3</sup>)</i>                                           | Ratio of Rate ratios (95% CI) | P value |
|--------------------------------------------------------------------------------------------|-------------------------------|---------|
| No adjustment                                                                              |                               |         |
| All areas                                                                                  | 0.92 (0.85 to 0.99)           | 0.024   |
| Areas with ≥20 events                                                                      | 0.91 (0.84 to 0.99)           | 0.037   |
| High income countries                                                                      | 0.86 (0.76 to 0.98)           | 0.022   |
| Adjusted for geographical regions                                                          |                               |         |
| All areas                                                                                  | 0.94 (0.87 to 1.01)           | 0.11    |
| Areas with ≥20 events                                                                      | 0.95 (0.87 to 1.03)           | 0.19    |
| High income countries                                                                      | 0.95 (0.85 to 1.07)           | 0.40    |
| Adjusted for prespecified covariates                                                       |                               |         |
| All areas                                                                                  | 0.91 (0.84 to 0.99)           | 0.025   |
| Areas with ≥20 events                                                                      | 0.90 (0.83 to 0.99)           | 0.22    |
| High income countries                                                                      | 0.94 (0.83 to 1.07)           | 0.36    |
| Adjusted for geographical regions and prespecified covariates                              |                               |         |
| All areas                                                                                  | 0.94 (0.86 to 1.02)           | 0.15    |
| Areas with ≥20 events                                                                      | 0.94 (0.85 to 1.04)           | 0.22    |
| High income countries                                                                      | 0.92 (0.82 to 1.03)           | 0.15    |
| Adjusted for geographical regions, prespecified covariates and public health interventions |                               |         |
| All areas                                                                                  | 0.93 (0.85 to 1.02)           | 0.11    |
| Areas with ≥20 events                                                                      | 0.93 (0.85 to 1.02)           | 0.14    |
| High income countries                                                                      | 0.92 (0.81 to 1.04)           | 0.17    |

Epidemic growth quantified by the rate ratio comparing the cumulative rate on March 27 with the cumulative rate on March 20, 2020; Ratio of rate ratios expressed per 5 g/m<sup>3</sup> increase in absolute humidity; CI, confidence interval; p values are 2-sided. 132 geopolitical areas were included in the analysis of areas with ≥20 events, and 98 areas were included in the analysis restricted to high income countries.



**Table S7. Association of epidemic growth with relative humidity**

| <i>Relative humidity (per 10%)</i>                                                         | Ratio of Rate ratios (95% CI) | P value |
|--------------------------------------------------------------------------------------------|-------------------------------|---------|
| No adjustment                                                                              |                               |         |
| All areas                                                                                  | 0.91 (0.85 to 0.96)           | 0.002   |
| Areas with $\geq 20$ events                                                                | 0.91 (0.85 to 0.97)           | 0.003   |
| High income countries                                                                      | 0.88 (0.81 to 0.95)           | 0.001   |
| Adjusted for geographical regions                                                          |                               |         |
| All areas                                                                                  | 0.95 (0.90 to 1.01)           | 0.10    |
| Areas with $\geq 20$ events                                                                | 0.96 (0.90 to 1.01)           | 0.13    |
| High income countries                                                                      | 0.95 (0.89 to 1.02)           | 0.13    |
| Adjusted for prespecified covariates                                                       |                               |         |
| All areas                                                                                  | 0.94 (0.89 to 1.00)           | 0.048   |
| Areas with $\geq 20$ events                                                                | 0.94 (0.89 to 1.00)           | 0.068   |
| High income countries                                                                      | 0.94 (0.87 to 1.01)           | 0.087   |
| Adjusted for geographical regions and prespecified covariates                              |                               |         |
| All areas                                                                                  | 0.95 (0.90 to 1.01)           | 0.13    |
| Areas with $\geq 20$ events                                                                | 0.96 (0.90 to 1.02)           | 0.19    |
| High income countries                                                                      | 0.95 (0.89 to 1.03)           | 0.22    |
| Adjusted for geographical regions, prespecified covariates and public health interventions |                               |         |
| All areas                                                                                  | 0.95 (0.89 to 1.01)           | 0.075   |
| Areas with $\geq 20$ events                                                                | 0.95 (0.90 to 1.01)           | 0.12    |
| High income countries                                                                      | 0.96 (0.90 to 1.03)           | 0.28    |

Epidemic growth quantified by the rate ratio comparing the cumulative rate on March 27 with the cumulative rate on March 20, 2020; Ratio of rate ratios expressed per 10% increase in relative humidity; CI, confidence interval; p values are 2-sided. 132 geopolitical areas were included in the analysis of areas with  $\geq 20$  events, and 98 areas were included in the analysis restricted to high income countries.

**Table S8. Association of epidemic growth with restrictions of mass gatherings**

| <i>Restrictions of mass gatherings</i>                                               | Ratio of Rate ratios (95% CI) | P value |
|--------------------------------------------------------------------------------------|-------------------------------|---------|
| No adjustment                                                                        |                               |         |
| All areas                                                                            | 0.65 (0.53 to 0.79)           | <0.001  |
| Areas with $\geq 20$ events                                                          | 0.63 (0.51 to 0.79)           | <0.001  |
| High income countries                                                                | 0.56 (0.44 to 0.72)           | <0.001  |
| Adjusted for geographical regions                                                    |                               |         |
| All areas                                                                            | 0.81 (0.67 to 0.98)           | 0.030   |
| Areas with $\geq 20$ events                                                          | 0.81 (0.67 to 0.98)           | 0.031   |
| High income countries                                                                | 0.78 (0.63 to 0.96)           | 0.017   |
| Adjusted for prespecified covariates                                                 |                               |         |
| All areas                                                                            | 0.81 (0.66 to 0.99)           | 0.038   |
| Areas with $\geq 20$ events                                                          | 0.80 (0.65 to 0.98)           | 0.032   |
| High income countries                                                                | 0.69 (0.55 to 0.87)           | 0.002   |
| Adjusted for geographical regions and prespecified covariates                        |                               |         |
| All areas                                                                            | 0.84 (0.69 to 1.02)           | 0.087   |
| Areas with $\geq 20$ events                                                          | 0.83 (0.68 to 1.02)           | 0.073   |
| High income countries                                                                | 0.72 (0.58 to 0.91)           | 0.005   |
| Adjusted for geographical regions, prespecified covariates, temperature and humidity |                               |         |
| All areas                                                                            | 0.83 (0.68 to 1.01)           | 0.063   |
| Areas with $\geq 20$ events                                                          | 0.82 (0.67 to 1.00)           | 0.055   |
| High income countries                                                                | 0.72 (0.57 to 0.90)           | 0.004   |

Epidemic growth quantified by the rate ratio comparing the cumulative rate on March 27 with the cumulative rate on March 20, 2020; CI, confidence interval; p values are 2-sided. 132 geopolitical areas were included in the analysis of areas with  $\geq 20$  events, and 98 areas were included in the analysis restricted to high income countries.

**Table S9. Association of epidemic growth with school closures**

| <i>School closures</i>                                                               | Ratio of rate ratios (95% CI) | P value |
|--------------------------------------------------------------------------------------|-------------------------------|---------|
| No adjustment                                                                        |                               |         |
| All areas                                                                            | 0.63 (0.52 to 0.78)           | <0.001  |
| Areas with $\geq 20$ events                                                          | 0.63 (0.51 to 0.78)           | <0.001  |
| High income countries                                                                | 0.58 (0.45 to 0.75)           | <0.001  |
| Adjusted for geographical regions                                                    |                               |         |
| All areas                                                                            | 0.81 (0.67 to 0.99)           | 0.038   |
| Areas with $\geq 20$ events                                                          | 0.81 (0.66 to 1.00)           | 0.045   |
| High income countries                                                                | 0.81 (0.64 to 1.03)           | 0.089   |
| Adjusted for prespecified covariates                                                 |                               |         |
| All areas                                                                            | 0.80 (0.66 to 0.98)           | 0.027   |
| Areas with $\geq 20$ events                                                          | 0.80 (0.66 to 0.98)           | 0.033   |
| High income countries                                                                | 0.73 (0.58 to 0.93)           | 0.012   |
| Adjusted for geographical regions and prespecified covariates                        |                               |         |
| All areas                                                                            | 0.80 (0.66 to 0.97)           | 0.026   |
| Areas with $\geq 20$ events                                                          | 0.78 (0.63 to 0.96)           | 0.017   |
| High income countries                                                                | 0.74 (0.58 to 0.95)           | 0.017   |
| Adjusted for geographical regions, prespecified covariates, temperature and humidity |                               |         |
| All areas                                                                            | 0.77 (0.63 to 0.93)           | 0.009   |
| Areas with $\geq 20$ events                                                          | 0.74 (0.60 to 0.92)           | 0.005   |
| High income countries                                                                | 0.72 (0.56 to 0.92)           | 0.009   |

Epidemic growth quantified by the rate ratio comparing the cumulative rate on March 27 with the cumulative rate on March 20, 2020; CI, confidence interval; p values are 2-sided. 132 geopolitical areas were included in the analysis of areas with  $\geq 20$  events, and 98 areas were included in the analysis restricted to high income countries.

**Table S10. Association of epidemic growth with measures of social distancing**

| <i>Social distancing</i>                                                             | Ratio of rate ratios (95% CI) | P value |
|--------------------------------------------------------------------------------------|-------------------------------|---------|
| No adjustment                                                                        |                               |         |
| All areas                                                                            | 0.62 (0.45 to 0.85)           | 0.003   |
| Areas with $\geq 20$ events                                                          | 0.59 (0.42 to 0.81)           | 0.001   |
| High income countries                                                                | 0.47 (0.31 to 0.72)           | 0.001   |
| Adjusted for geographical regions                                                    |                               |         |
| All areas                                                                            | 0.82 (0.62 to 1.07)           | 0.15    |
| Areas with $\geq 20$ events                                                          | 0.81 (0.61 to 1.07)           | 0.14    |
| High income countries                                                                | 0.73 (0.52 to 1.03)           | 0.073   |
| Adjusted for prespecified covariates                                                 |                               |         |
| All areas                                                                            | 0.86 (0.65 to 1.15)           | 0.31    |
| Areas with $\geq 20$ events                                                          | 0.84 (0.63 to 1.13)           | 0.26    |
| High income countries                                                                | 0.74 (0.52 to 1.05)           | 0.096   |
| Adjusted for geographical regions and prespecified covariates                        |                               |         |
| All areas                                                                            | 0.90 (0.68 to 1.19)           | 0.46    |
| Areas with $\geq 20$ events                                                          | 0.88 (0.66 to 1.17)           | 0.37    |
| High income countries                                                                | 0.79 (0.56 to 1.13)           | 0.20    |
| Adjusted for geographical regions, prespecified covariates, temperature and humidity |                               |         |
| All areas                                                                            | 0.88 (0.67 to 1.16)           | 0.37    |
| Areas with $\geq 20$ events                                                          | 0.86 (0.65 to 1.15)           | 0.31    |
| High income countries                                                                | 0.81 (0.57 to 1.16)           | 0.25    |

Epidemic growth quantified by the rate ratio comparing the cumulative rate on March 27 with the cumulative rate on March 20, 2020; CI, confidence interval; p values are 2-sided. 132 geopolitical areas were included in the analysis of areas with  $\geq 20$  events, and 98 areas were included in the analysis restricted to high income countries.

**Table S11. Association of epidemic growth with composite of any public health intervention**

| <i>Any public health intervention</i>                                                | Ratio of rate ratios (95% CI) | P value |
|--------------------------------------------------------------------------------------|-------------------------------|---------|
| No adjustment                                                                        |                               |         |
| All areas                                                                            | 0.62 (0.53 to 0.73)           | <0.001  |
| Areas with $\geq 20$ events                                                          | 0.62 (0.52 to 0.73)           | <0.001  |
| High income countries                                                                | 0.56 (0.46 to 0.68)           | <0.001  |
| Adjusted for geographical regions                                                    |                               |         |
| All areas                                                                            | 0.79 (0.67 to 0.93)           | 0.006   |
| Areas with $\geq 20$ events                                                          | 0.79 (0.66 to 0.93)           | 0.006   |
| High income countries                                                                | 0.78 (0.64 to 0.96)           | 0.016   |
| Adjusted for prespecified covariates                                                 |                               |         |
| All areas                                                                            | 0.79 (0.66 to 0.93)           | 0.005   |
| Areas with $\geq 20$ events                                                          | 0.78 (0.66 to 0.93)           | 0.006   |
| High income countries                                                                | 0.73 (0.60 to 0.88)           | 0.001   |
| Adjusted for geographical regions and prespecified covariates                        |                               |         |
| All areas                                                                            | 0.82 (0.69 to 0.97)           | 0.022   |
| Areas with $\geq 20$ events                                                          | 0.81 (0.68 to 0.97)           | 0.019   |
| High income countries                                                                | 0.77 (0.63 to 0.94)           | 0.010   |
| Adjusted for geographical regions, prespecified covariates, temperature and humidity |                               |         |
| All areas                                                                            | 0.80 (0.68 to 0.95)           | 0.011   |
| Areas with $\geq 20$ events                                                          | 0.79 (0.67 to 0.95)           | 0.010   |
| High income countries                                                                | 0.77 (0.63 to 0.94)           | 0.010   |

Epidemic growth quantified by the rate ratio comparing the cumulative rate on March 27 with the cumulative rate on March 20, 2020; CI, confidence interval; p values are 2-sided. 132 geopolitical areas were included in the analysis of areas with  $\geq 20$  events, and 98 areas were included in the analysis restricted to high income countries.

**Table S12. Association of epidemic growth with number of public health interventions**

| <i>Number of interventions implemented</i>                                           | 1 intervention      | 2 or 3 interventions | P value |
|--------------------------------------------------------------------------------------|---------------------|----------------------|---------|
|                                                                                      | RRR (95% CI)        | RRR (95% CI)         |         |
| No adjustment                                                                        |                     |                      |         |
| All areas                                                                            | 0.67 (0.55 to 0.82) | 0.54 (0.42 to 0.70)  | <0.001  |
| Areas with ≥20 events                                                                | 0.67 (0.55 to 0.82) | 0.52 (0.40 to 0.68)  | <0.001  |
| High income countries                                                                | 0.63 (0.51 to 0.78) | 0.41 (0.29 to 0.57)  | <0.001  |
| Adjusted for geographical regions                                                    |                     |                      |         |
| All areas                                                                            | 0.82 (0.68 to 0.99) | 0.73 (0.57 to 0.93)  | 0.004   |
| Areas with ≥20 events                                                                | 0.82 (0.68 to 0.99) | 0.72 (0.56 to 0.93)  | 0.004   |
| High income countries                                                                | 0.83 (0.68 to 1.02) | 0.62 (0.45 to 0.85)  | 0.002   |
| Adjusted for prespecified covariates                                                 |                     |                      |         |
| All areas                                                                            | 0.82 (0.68 to 0.99) | 0.72 (0.56 to 0.93)  | 0.016   |
| Areas with ≥20 events                                                                | 0.82 (0.67 to 1.00) | 0.71 (0.54 to 0.92)  | 0.016   |
| High income countries                                                                | 0.79 (0.65 to 0.95) | 0.51 (0.37 to 0.70)  | 0.001   |
| Adjusted for geographical regions and prespecified covariates                        |                     |                      |         |
| All areas                                                                            | 0.86 (0.71 to 1.05) | 0.74 (0.57 to 0.95)  | 0.042   |
| Areas with ≥20 events                                                                | 0.86 (0.71 to 1.04) | 0.71 (0.55 to 0.93)  | 0.030   |
| High income countries                                                                | 0.83 (0.68 to 1.02) | 0.52 (0.37 to 0.73)  | 0.001   |
| Adjusted for geographical regions, prespecified covariates, temperature and humidity |                     |                      |         |
| All areas                                                                            | 0.85 (0.70 to 1.03) | 0.72 (0.56 to 0.92)  | 0.021   |
| Areas with ≥20 events                                                                | 0.84 (0.70 to 1.03) | 0.69 (0.53 to 0.90)  | 0.015   |
| High income countries                                                                | 0.83 (0.68 to 1.02) | 0.52 (0.37 to 0.72)  | 0.001   |

Epidemic growth quantified by the rate ratio comparing the cumulative rate on March 27 with the cumulative rate on March 20, 2020; RRR, Ratio of rate ratios; CI, confidence interval; p values for trend are 2-sided. 132 geopolitical areas were included in the analysis of areas with ≥20 events, and 98 areas were included in the analysis restricted to high income countries.

**Table S13. Post-hoc use of alternative outcome definition to measure epidemic growth: univariate analyses**

| Variable                                               | Ratio of Rate ratios (95% CI) | P value |
|--------------------------------------------------------|-------------------------------|---------|
| Latitude (per 400 degrees <sup>2</sup> )               | 0.97 (0.89 to 1.07)           | 0.57    |
| Temperature (per 5°C)                                  | 0.94 (0.83 to 1.06)           | 0.32    |
| Relative humidity (per 10%)                            | 0.79 (0.66 to 0.94)           | 0.007   |
| Absolute humidity (per 5g/m <sup>3</sup> )             | 0.82 (0.67 to 1.02)           | 0.070   |
| Altitude (per 100m)                                    | 1.04 (1.00 to 1.09)           | 0.07    |
| Passenger flights (per 1 passenger/inhabitant/year)    | 0.97 (0.91 to 1.03)           | 0.29    |
| Urban density (per 5000 inhabitants/km <sup>2</sup> )  | 1.07 (0.87 to 1.31)           | 0.52    |
| Percentage of inhabitants aged 65 or above (per 5%)    | 1.10 (0.90 to 1.34)           | 0.34    |
| Life expectancy at birth (per 5 years)                 | 0.88 (0.69 to 1.13)           | 0.31    |
| GDP (per 20'000 USD/inhabitant)                        | 1.09 (0.94 to 1.27)           | 0.25    |
| Health expenditure as percentage of GDP (per 5%)       | 1.74 (1.39 to 2.19)           | <0.001  |
| Infectious Disease Vulnerability Index (per 0.1)       | 1.11 (0.98 to 1.25)           | 0.010   |
| Any public health intervention                         | 0.26 (0.17 to 0.41)           | <0.001  |
| Restrictions of mass gatherings                        | 0.28 (0.16 to 0.48)           | <0.001  |
| School closures                                        | 0.28 (0.16 to 0.49)           | <0.001  |
| Social distancing                                      | 0.22 (0.10 to 0.49)           | 0.0002  |
| Number of public health interventions                  |                               | <0.001  |
| 1 intervention                                         | 0.34 (0.20 to 0.56)           |         |
| 2 or 3 interventions                                   | 0.17 (0.09 to 0.33)           |         |
| Global region                                          |                               | <0.001  |
| Oceania                                                | 3.28 (1.15 to 9.37)           |         |
| Europe                                                 | 1.13 (0.64 to 2.01)           |         |
| Africa                                                 | 3.19 (1.28 to 7.94)           |         |
| Americas                                               | 4.04 (2.40 to 6.82)           |         |
| Closest distance to established epidemic (per 1000 km) | 1.18 (1.11 to 1.25)           | <0.001  |

Post-hoc use of different outcome definition to measure epidemic growth: univariate models. See supplementary methods for a description of the alternative outcome definition.

**Table S14. Post-hoc use of alternative outcome definition to measure epidemic growth: multivariable analysis**

| Variable                                               | Ratio of Rate ratios (95% CI) | P value |
|--------------------------------------------------------|-------------------------------|---------|
| Absolute humidity (per 5g/m <sup>3</sup> )             | 0.79 (0.62 to 1.03)           | 0.080   |
| Urban density (per 5000 inhabitants/km <sup>2</sup> )  | 1.27 (1.04 to 1.56)           | 0.019   |
| GDP (per 20'000 USD/inhabitant)                        | 0.89 (0.76 to 1.04)           | 0.13    |
| Health expenditure as percentage of GDP (per 5%)       | 1.32 (0.92 to 1.88)           | 0.13    |
| Number of public health interventions                  |                               | 0.001   |
| 1 intervention                                         | 0.51 (0.29 to 0.87)           |         |
| 2 or 3 interventions                                   | 0.26 (0.13 to 0.52)           |         |
| Global region                                          |                               | 0.62    |
| Oceania                                                | 2.12 (0.38 to 11.98)          |         |
| Europe                                                 | 0.76 (0.39 to 1.48)           |         |
| Africa                                                 | 1.35 (0.51 to 3.57)           |         |
| Americas                                               | 1.90 (0.35 to 10.14)          |         |
| Closest distance to established epidemic (per 1000 km) | 0.99 (0.81 to 1.20)           | 0.92    |

Post-hoc use of different outcome definition to measure epidemic growth: results from parsimonious multivariable model. See supplementary methods for a description of the alternative outcome definition.



**Table S15. Bias domains for association of epidemic growth with square of the latitude**

| Domain (square of the latitude)                  | Judgement | Explanation                                                                                                                                                                                                                                                                                                                                                                                                                                                                                                                                                                                                                                                                                                                                          |
|--------------------------------------------------|-----------|------------------------------------------------------------------------------------------------------------------------------------------------------------------------------------------------------------------------------------------------------------------------------------------------------------------------------------------------------------------------------------------------------------------------------------------------------------------------------------------------------------------------------------------------------------------------------------------------------------------------------------------------------------------------------------------------------------------------------------------------------|
| Bias due to confounding                          | Low       | <ul style="list-style-type: none"> <li>• Association between epidemic growth and square of the latitude unconfounded <i>a priori</i>. Latitude at start of directed acyclic graph, driving climate variables.</li> <li>• Major geographical regions included as covariate in multivariable models to address residual confounding due to geographic progression of the pandemic from continent to continent over time, which could be correlated with exposure.</li> <li>• Estimates of association robust in different multivariable models and analysis sets with little or no evidence against the null hypothesis.</li> </ul>                                                                                                                    |
| Bias in selection of participants into the study | Low       | <ul style="list-style-type: none"> <li>• Prespecified eligibility criteria.</li> <li>• All eligible geopolitical areas included.</li> </ul>                                                                                                                                                                                                                                                                                                                                                                                                                                                                                                                                                                                                          |
| Bias in classification of exposure               | Low       | <ul style="list-style-type: none"> <li>• Measured using coordinates of capital of geopolitical areas (states for United States and Australia, provinces for Canada, overseas territories, and countries for the rest of the world). Capital region typically among most populous regions of geopolitical area, measured exposure representative for a substantial proportion of population.</li> <li>• No transformation required since analyzed close to vernal equinox, when sun at equator and climate comparable by latitude in northern and southern hemispheres.</li> <li>• Non-differential misclassification likely for a small number of large countries such as Brazil, which would bias association slightly towards the null.</li> </ul> |
| Bias due to deviations from exposure             | Low       | <ul style="list-style-type: none"> <li>• No deviations possible.</li> </ul>                                                                                                                                                                                                                                                                                                                                                                                                                                                                                                                                                                                                                                                                          |
| Bias due to missing data                         | Low       | <ul style="list-style-type: none"> <li>• No missing data.</li> </ul>                                                                                                                                                                                                                                                                                                                                                                                                                                                                                                                                                                                                                                                                                 |
| Bias in measurement of outcome                   | Low       | <ul style="list-style-type: none"> <li>• Rate ratio derived from cumulative incidences of confirmed COVID-19 cases at beginning and end of a one-week follow-up period.</li> <li>• Accounting for variation in testing strategies between geopolitical areas, as each area serves as its own reference when deriving rate ratios</li> <li>• Smoothing out estimates by averaging out the daily highs and lows over a longer period, decreasing the risk of non-differential misclassification.</li> </ul>                                                                                                                                                                                                                                            |
| Bias in selection of the reported result         | Low       | <ul style="list-style-type: none"> <li>• All analyses pre-specified in the protocol reported.</li> <li>• Post-hoc analyses clearly specified. as such.</li> </ul>                                                                                                                                                                                                                                                                                                                                                                                                                                                                                                                                                                                    |
| Overall                                          | Low       | <ul style="list-style-type: none"> <li>• All domains judged to be at low risk of bias</li> </ul>                                                                                                                                                                                                                                                                                                                                                                                                                                                                                                                                                                                                                                                     |

Summary of risk of bias for non-randomized studies of exposures or interventions.<sup>1,2</sup>

**Table S16. Bias domains for association of epidemic growth with temperature**

| Domain (temperature)                             | Judgement | Explanation                                                                                                                                                                                                                                                                                                                                                                                                                                                                                                                                                                                                                                                                                            |
|--------------------------------------------------|-----------|--------------------------------------------------------------------------------------------------------------------------------------------------------------------------------------------------------------------------------------------------------------------------------------------------------------------------------------------------------------------------------------------------------------------------------------------------------------------------------------------------------------------------------------------------------------------------------------------------------------------------------------------------------------------------------------------------------|
| Bias due to confounding                          | Low       | <ul style="list-style-type: none"> <li>Major geographical regions included as covariate in multivariable models to address residual confounding due to geographic progression of the pandemic from continent to continent over time, which could be correlated with exposure.</li> <li>Estimates of association robust in different multivariable models and analysis sets with little or no evidence against the null hypothesis.</li> </ul>                                                                                                                                                                                                                                                          |
| Bias in selection of participants into the study | Low       | <ul style="list-style-type: none"> <li>Prespecified eligibility criteria.</li> <li>All eligible geopolitical areas included.</li> </ul>                                                                                                                                                                                                                                                                                                                                                                                                                                                                                                                                                                |
| Bias in classification of exposure               | Low       | <ul style="list-style-type: none"> <li>Exposure assessed for capital of geopolitical areas (states for United States and Australia, provinces for Canada, overseas territories, and countries for the rest of the world). Capital region typically among most populous regions of geopolitical area, measured exposure representative for a substantial proportion of population.</li> <li>Temperature less variable within geopolitical area than absolute and relative humidity.</li> <li>Non-differential misclassification likely for a small number of large countries such as Brazil given the spatial variation in exposure, which would bias association slightly towards the null.</li> </ul> |
| Bias due to deviations from exposure             | Low       | <ul style="list-style-type: none"> <li>No deviations possible.</li> </ul>                                                                                                                                                                                                                                                                                                                                                                                                                                                                                                                                                                                                                              |
| Bias due to missing data                         | Low       | <ul style="list-style-type: none"> <li>No missing data.</li> </ul>                                                                                                                                                                                                                                                                                                                                                                                                                                                                                                                                                                                                                                     |
| Bias in measurement of outcome                   | Low       | <ul style="list-style-type: none"> <li>Rate ratio derived from cumulative incidences of confirmed COVID-19 cases at beginning and end of a one-week follow-up period.</li> <li>Accounting for variation in testing strategies between geopolitical areas, as each area serves as its own reference when deriving rate ratios</li> <li>Smoothing out estimates by averaging out the daily highs and lows over a longer period, decreasing the risk of non-differential misclassification.</li> </ul>                                                                                                                                                                                                    |
| Bias in selection of the reported result         | Low       | <ul style="list-style-type: none"> <li>All analyses pre-specified in the protocol reported. Post-hoc analyses clearly specified.</li> </ul>                                                                                                                                                                                                                                                                                                                                                                                                                                                                                                                                                            |
| Overall                                          | Low       | <ul style="list-style-type: none"> <li>All domains judged to be at low risk of bias</li> </ul>                                                                                                                                                                                                                                                                                                                                                                                                                                                                                                                                                                                                         |

Summary of risk of bias for non-randomized studies of exposures or interventions.<sup>1,2</sup>

**Table S17. Bias domains for association of epidemic growth with relative humidity**

| Domain (relative humidity)                       | Judgement | Explanation                                                                                                                                                                                                                                                                                                                                                                                                                                                                                                                                                                                                                                                                 |
|--------------------------------------------------|-----------|-----------------------------------------------------------------------------------------------------------------------------------------------------------------------------------------------------------------------------------------------------------------------------------------------------------------------------------------------------------------------------------------------------------------------------------------------------------------------------------------------------------------------------------------------------------------------------------------------------------------------------------------------------------------------------|
| Bias due to confounding                          | Moderate  | <ul style="list-style-type: none"> <li>Major geographical regions included as covariate in multivariable models to address residual confounding due to geographic progression of the pandemic from continent to continent over time, which could be correlated with exposure.</li> <li>Estimates of association vary in different multivariable models and analysis sets, with changing extent of evidence against the null hypothesis.</li> </ul>                                                                                                                                                                                                                          |
| Bias in selection of participants into the study | Low       | <ul style="list-style-type: none"> <li>Prespecified eligibility criteria.</li> <li>All eligible geopolitical areas included.</li> </ul>                                                                                                                                                                                                                                                                                                                                                                                                                                                                                                                                     |
| Bias in classification of exposure               | Moderate  | <ul style="list-style-type: none"> <li>Exposure assessed for capital of geopolitical areas (states for United States and Australia, provinces for Canada, overseas territories, and countries for the rest of the world). Capital region typically among most populous regions of geopolitical area, measured exposure representative for a substantial proportion of population.</li> <li>Relative humidity considerably more variable within geopolitical area than absolute humidity and temperature.</li> <li>Non-differential misclassification likely given the spatial and temporal variation in exposure, which would bias association towards the null.</li> </ul> |
| Bias due to deviations from exposure             | Low       | <ul style="list-style-type: none"> <li>No deviations possible.</li> </ul>                                                                                                                                                                                                                                                                                                                                                                                                                                                                                                                                                                                                   |
| Bias due to missing data                         | Low       | <ul style="list-style-type: none"> <li>No missing data.</li> </ul>                                                                                                                                                                                                                                                                                                                                                                                                                                                                                                                                                                                                          |
| Bias in measurement of outcome                   | Low       | <ul style="list-style-type: none"> <li>Rate ratio derived from cumulative incidences of confirmed COVID-19 cases at beginning and end of a one-week follow-up period.</li> <li>Accounting for variation in testing strategies between geopolitical areas, as each area serves as its own reference when deriving rate ratios</li> <li>Smoothing out estimates by averaging out the daily highs and lows over a longer period, decreasing the risk of non-differential misclassification.</li> </ul>                                                                                                                                                                         |
| Bias in selection of the reported result         | Low       | <ul style="list-style-type: none"> <li>All analyses pre-specified in the protocol reported. Post-hoc analyses clearly specified.</li> </ul>                                                                                                                                                                                                                                                                                                                                                                                                                                                                                                                                 |
| Overall                                          | Moderate  | <ul style="list-style-type: none"> <li>Moderate risk of bias due to confounding (either direction) and non-differential misclassification (bias towards the null).</li> </ul>                                                                                                                                                                                                                                                                                                                                                                                                                                                                                               |

Summary of risk of bias for non-randomized studies of exposures or interventions.<sup>1,2</sup>

**Table S18. Bias domains for association of epidemic growth with absolute humidity**

| Domain (absolute humidity)                       | Judgement | Explanation                                                                                                                                                                                                                                                                                                                                                                                                                                                                                                                                                                                                                                                                                                                                                                                                                                      |
|--------------------------------------------------|-----------|--------------------------------------------------------------------------------------------------------------------------------------------------------------------------------------------------------------------------------------------------------------------------------------------------------------------------------------------------------------------------------------------------------------------------------------------------------------------------------------------------------------------------------------------------------------------------------------------------------------------------------------------------------------------------------------------------------------------------------------------------------------------------------------------------------------------------------------------------|
| Bias due to confounding                          | Moderate  | <ul style="list-style-type: none"> <li>Major geographical regions included as covariate in multivariable models to address residual confounding due to geographic progression of the pandemic from continent to continent over time, which could be correlated with exposure.</li> <li>Estimates of association vary somewhat in different multivariable models and analysis sets, with changing extent of evidence against the null hypothesis.</li> </ul>                                                                                                                                                                                                                                                                                                                                                                                      |
| Bias in selection of participants into the study | Low       | <ul style="list-style-type: none"> <li>Prespecified eligibility criteria.</li> <li>All eligible geopolitical areas included.</li> </ul>                                                                                                                                                                                                                                                                                                                                                                                                                                                                                                                                                                                                                                                                                                          |
| Bias in classification of exposure               | Moderate  | <ul style="list-style-type: none"> <li>Exposure assessed for capital of geopolitical areas (states for United States and Australia, provinces for Canada, overseas territories, and countries for the rest of the world). Capital region typically among most populous regions of geopolitical area, measured exposure representative for a substantial proportion of population.</li> <li>Absolute humidity more variable than temperature within geopolitical area, but considerably less variable than relative humidity.</li> <li>Non-differential misclassification likely for a small number of large countries such as Brazil and for a small number of countries with highly variable climates given the spatial variation in exposure and proximity to large bodies of water, which would bias association towards the null.</li> </ul> |
| Bias due to deviations from exposure             | Low       | <ul style="list-style-type: none"> <li>No deviations possible.</li> </ul>                                                                                                                                                                                                                                                                                                                                                                                                                                                                                                                                                                                                                                                                                                                                                                        |
| Bias due to missing data                         | Low       | <ul style="list-style-type: none"> <li>No missing data.</li> </ul>                                                                                                                                                                                                                                                                                                                                                                                                                                                                                                                                                                                                                                                                                                                                                                               |
| Bias in measurement of outcome                   | Low       | <ul style="list-style-type: none"> <li>Rate ratio derived from cumulative incidences of confirmed COVID-19 cases at beginning and end of a one-week follow-up period.</li> <li>Accounting for variation in testing strategies between geopolitical areas, as each area serves as its own reference when deriving rate ratios</li> <li>Smoothing out estimates by averaging out the daily highs and lows over a longer period, decreasing the risk of non-differential misclassification.</li> </ul>                                                                                                                                                                                                                                                                                                                                              |
| Bias in selection of the reported result         | Low       | <ul style="list-style-type: none"> <li>All analyses pre-specified in the protocol reported. Post-hoc analyses clearly specified.</li> </ul>                                                                                                                                                                                                                                                                                                                                                                                                                                                                                                                                                                                                                                                                                                      |
| Overall                                          | Moderate  | <ul style="list-style-type: none"> <li>Moderate risk of bias due to confounding (either direction) and non-differential misclassification (bias towards the null).</li> </ul>                                                                                                                                                                                                                                                                                                                                                                                                                                                                                                                                                                                                                                                                    |

Summary of risk of bias for non-randomized studies of exposures or interventions.<sup>1,2</sup>

**Table S19. Bias domains for association of epidemic growth with composite of any public health intervention**

| Domain (any public health intervention)          | Judgement | Explanation                                                                                                                                                                                                                                                                                                                                                                                                                                                                                                                                                                                                                                                                                                                                                                                              |
|--------------------------------------------------|-----------|----------------------------------------------------------------------------------------------------------------------------------------------------------------------------------------------------------------------------------------------------------------------------------------------------------------------------------------------------------------------------------------------------------------------------------------------------------------------------------------------------------------------------------------------------------------------------------------------------------------------------------------------------------------------------------------------------------------------------------------------------------------------------------------------------------|
| Bias due to confounding                          | Low       | <ul style="list-style-type: none"> <li>Major geographical regions included as covariate in multivariable models to address residual confounding due to geographic progression of the pandemic from continent to continent over time, which could be correlated with exposure.</li> <li>Implementation of public health interventions may have been temporarily associated with an increase in testing activities during the follow-up period. This likely has happened only in a small number of geopolitical areas as availability of tests was limited globally during our study period and would have biased estimates slightly towards the null.</li> <li>Estimates of association decreased in different multivariable models, but strong evidence against the null hypothesis remained.</li> </ul> |
| Bias in selection of participants into the study | Low       | <ul style="list-style-type: none"> <li>Prespecified eligibility criteria.</li> <li>All eligible geopolitical areas included.</li> </ul>                                                                                                                                                                                                                                                                                                                                                                                                                                                                                                                                                                                                                                                                  |
| Bias in classification of intervention           | Low       | <ul style="list-style-type: none"> <li>Assessed at level of geopolitical area (states for United States and Australia, provinces for Canada, overseas territories, and countries for the rest of the world).</li> <li>Representative for the analyzed geopolitical area.</li> </ul>                                                                                                                                                                                                                                                                                                                                                                                                                                                                                                                      |
| Bias due to deviations from intervention         | Low       | <ul style="list-style-type: none"> <li>Deviations from interventions could not be assessed across geopolitical areas; likely that adherence was high for school closures.</li> <li>Deviations would bias estimates towards the null.</li> </ul>                                                                                                                                                                                                                                                                                                                                                                                                                                                                                                                                                          |
| Bias due to missing data                         | Low       | <ul style="list-style-type: none"> <li>No missing data.</li> </ul>                                                                                                                                                                                                                                                                                                                                                                                                                                                                                                                                                                                                                                                                                                                                       |
| Bias in measurement of outcome                   | Low       | <ul style="list-style-type: none"> <li>Rate ratio derived from cumulative incidences of confirmed COVID-19 cases at beginning and end of a one-week follow-up period.</li> <li>Accounting for variation in testing strategies between geopolitical areas, as each area serves as its own reference when deriving rate ratios</li> <li>Smoothing out estimates by averaging out the daily highs and lows over a longer period, decreasing the risk of non-differential misclassification.</li> </ul>                                                                                                                                                                                                                                                                                                      |
| Bias in selection of the reported result         | Low       | <ul style="list-style-type: none"> <li>All analyses pre-specified in the protocol reported. Post-hoc analyses clearly specified.</li> </ul>                                                                                                                                                                                                                                                                                                                                                                                                                                                                                                                                                                                                                                                              |
| Overall                                          | Low       | <ul style="list-style-type: none"> <li>All domains judged to be at low risk of bias</li> </ul>                                                                                                                                                                                                                                                                                                                                                                                                                                                                                                                                                                                                                                                                                                           |

Summary of risk of bias for non-randomized studies of exposures or interventions.<sup>1,2</sup>

**Table S20. Bias domains for association of epidemic growth with restriction of mass gatherings**

| Domain (restriction of mass gatherings)          | Judgement | Explanation                                                                                                                                                                                                                                                                                                                                                                                                                                                                                                                                                                                                                                                                                                                                                                                                                                                                                                                                                                                                                                                                                                                                                       |
|--------------------------------------------------|-----------|-------------------------------------------------------------------------------------------------------------------------------------------------------------------------------------------------------------------------------------------------------------------------------------------------------------------------------------------------------------------------------------------------------------------------------------------------------------------------------------------------------------------------------------------------------------------------------------------------------------------------------------------------------------------------------------------------------------------------------------------------------------------------------------------------------------------------------------------------------------------------------------------------------------------------------------------------------------------------------------------------------------------------------------------------------------------------------------------------------------------------------------------------------------------|
| Bias due to confounding                          | Moderate  | <ul style="list-style-type: none"> <li>• Major geographical regions included as covariate in multivariable models to address residual confounding due to geographic progression of the pandemic from continent to continent over time, which could be correlated with exposure.</li> <li>• Implementation of public health interventions may have been temporarily associated with an increase in testing activities during the follow-up period. This likely has happened only in a small number of geopolitical areas as availability of tests was limited globally during our study period and would have biased estimates slightly towards the null.</li> <li>• Temporal clustering of implementation of public health interventions with a relatively low number of geopolitical areas with implementation before or during exposure period. Inability to determine the association of epidemic growth with restriction of mass gatherings independent of the remaining 2 public health interventions.</li> <li>• Estimates of association decreased in different multivariable models, but strong evidence against the null hypothesis remained.</li> </ul> |
| Bias in selection of participants into the study | Low       | <ul style="list-style-type: none"> <li>• Prespecified eligibility criteria.</li> <li>• All eligible geopolitical areas included.</li> </ul>                                                                                                                                                                                                                                                                                                                                                                                                                                                                                                                                                                                                                                                                                                                                                                                                                                                                                                                                                                                                                       |
| Bias in classification of intervention           | Low       | <ul style="list-style-type: none"> <li>• Assessed at level of geopolitical area (states for United States and Australia, provinces for Canada, overseas territories, and countries for the rest of the world).</li> <li>• Representative for the analyzed geopolitical area.</li> </ul>                                                                                                                                                                                                                                                                                                                                                                                                                                                                                                                                                                                                                                                                                                                                                                                                                                                                           |
| Bias due to deviations from intervention         | Low       | <ul style="list-style-type: none"> <li>• Deviations from interventions could not be assessed across geopolitical areas.</li> <li>• Deviations would bias estimates towards the null.</li> </ul>                                                                                                                                                                                                                                                                                                                                                                                                                                                                                                                                                                                                                                                                                                                                                                                                                                                                                                                                                                   |
| Bias due to missing data                         | Low       | <ul style="list-style-type: none"> <li>• No missing data.</li> </ul>                                                                                                                                                                                                                                                                                                                                                                                                                                                                                                                                                                                                                                                                                                                                                                                                                                                                                                                                                                                                                                                                                              |
| Bias in measurement of outcome                   | Low       | <ul style="list-style-type: none"> <li>• Rate ratio derived from cumulative incidences of confirmed COVID-19 cases at beginning and end of a one-week follow-up period.</li> <li>• Accounting for variation in testing strategies between geopolitical areas, as each area serves as its own reference when deriving rate ratios</li> <li>• Smoothing out estimates by averaging out the daily highs and lows over a longer period, decreasing the risk of non-differential misclassification.</li> </ul>                                                                                                                                                                                                                                                                                                                                                                                                                                                                                                                                                                                                                                                         |
| Bias in selection of the reported result         | Low       | <ul style="list-style-type: none"> <li>• All analyses pre-specified in the protocol reported. Post-hoc analyses clearly specified.</li> </ul>                                                                                                                                                                                                                                                                                                                                                                                                                                                                                                                                                                                                                                                                                                                                                                                                                                                                                                                                                                                                                     |

|         |          |                                                                                                                                                                       |
|---------|----------|-----------------------------------------------------------------------------------------------------------------------------------------------------------------------|
| Overall | Moderate | <ul style="list-style-type: none"> <li>• Moderate risk of bias due to confounding with other public health interventions (more likely away from the null).</li> </ul> |
|---------|----------|-----------------------------------------------------------------------------------------------------------------------------------------------------------------------|

---

Summary of risk of bias for non-randomized studies of exposures or interventions.<sup>1,2</sup>

**Table S21. Bias domains for association of epidemic growth with social distancing**

| Domain (social distancing)                       | Judgement | Explanation                                                                                                                                                                                                                                                                                                                                                                                                                                                                                                                                                                                                                                                                                                                                                                                                                                                                                                                                                                                                                                                                                                                                              |
|--------------------------------------------------|-----------|----------------------------------------------------------------------------------------------------------------------------------------------------------------------------------------------------------------------------------------------------------------------------------------------------------------------------------------------------------------------------------------------------------------------------------------------------------------------------------------------------------------------------------------------------------------------------------------------------------------------------------------------------------------------------------------------------------------------------------------------------------------------------------------------------------------------------------------------------------------------------------------------------------------------------------------------------------------------------------------------------------------------------------------------------------------------------------------------------------------------------------------------------------|
| Bias due to confounding                          | Moderate  | <ul style="list-style-type: none"> <li>• Major geographical regions included as covariate in multivariable models to address residual confounding due to geographic progression of the pandemic from continent to continent over time, which could be correlated with exposure.</li> <li>• Implementation of public health interventions may have been temporarily associated with an increase in testing activities during the follow-up period. This likely has happened only in a small number of geopolitical areas as availability of tests was limited globally during our study period and would have biased estimates slightly towards the null.</li> <li>• Temporal clustering of implementation of public health interventions with a relatively low number of geopolitical areas with implementation before or during exposure period. Inability to determine the association of epidemic growth with social distancing independent of the remaining 2 public health interventions.</li> <li>• Estimates of association decreased in different multivariable models, with changing extent of evidence against the null hypothesis.</li> </ul> |
| Bias in selection of participants into the study | Low       | <ul style="list-style-type: none"> <li>• Prespecified eligibility criteria.</li> <li>• All eligible geopolitical areas included.</li> </ul>                                                                                                                                                                                                                                                                                                                                                                                                                                                                                                                                                                                                                                                                                                                                                                                                                                                                                                                                                                                                              |
| Bias in classification of intervention           | Low       | <ul style="list-style-type: none"> <li>• Assessed at level of geopolitical area (states for United States and Australia, provinces for Canada, overseas territories, and countries for the rest of the world).</li> <li>• Representative for the analyzed geopolitical area.</li> </ul>                                                                                                                                                                                                                                                                                                                                                                                                                                                                                                                                                                                                                                                                                                                                                                                                                                                                  |
| Bias due to deviations from intervention         | Low       | <ul style="list-style-type: none"> <li>• Deviations from interventions could not be assessed across geopolitical areas.</li> <li>• Deviations would bias estimates towards the null.</li> </ul>                                                                                                                                                                                                                                                                                                                                                                                                                                                                                                                                                                                                                                                                                                                                                                                                                                                                                                                                                          |
| Bias due to missing data                         | Low       | <ul style="list-style-type: none"> <li>• No missing data.</li> </ul>                                                                                                                                                                                                                                                                                                                                                                                                                                                                                                                                                                                                                                                                                                                                                                                                                                                                                                                                                                                                                                                                                     |
| Bias in measurement of outcome                   | Low       | <ul style="list-style-type: none"> <li>• Rate ratio derived from cumulative incidences of confirmed COVID-19 cases at beginning and end of a one-week follow-up period.</li> <li>• Accounting for variation in testing strategies between geopolitical areas, as each area serves as its own reference when deriving rate ratios</li> <li>• Smoothing out estimates by averaging out the daily highs and lows over a longer period, decreasing the risk of non-differential misclassification.</li> </ul>                                                                                                                                                                                                                                                                                                                                                                                                                                                                                                                                                                                                                                                |
| Bias in selection of the reported result         | Low       | <ul style="list-style-type: none"> <li>• All analyses pre-specified in the protocol reported. Post-hoc analyses clearly specified.</li> </ul>                                                                                                                                                                                                                                                                                                                                                                                                                                                                                                                                                                                                                                                                                                                                                                                                                                                                                                                                                                                                            |



|         |          |                                                                                                                                                                       |
|---------|----------|-----------------------------------------------------------------------------------------------------------------------------------------------------------------------|
| Overall | Moderate | <ul style="list-style-type: none"> <li>• Moderate risk of bias due to confounding with other public health interventions (more likely away from the null).</li> </ul> |
|---------|----------|-----------------------------------------------------------------------------------------------------------------------------------------------------------------------|

---

Summary of risk of bias for non-randomized studies of exposures or interventions.<sup>1,2</sup>

**Table S22. Bias domains for association of epidemic growth with school closures**

| Domain (social distancing)                       | Judgement | Explanation                                                                                                                                                                                                                                                                                                                                                                                                                                                                                                                                                                                                                                                                                                                                                                                                                                                                                                                                                                                                                                                                                                                                        |
|--------------------------------------------------|-----------|----------------------------------------------------------------------------------------------------------------------------------------------------------------------------------------------------------------------------------------------------------------------------------------------------------------------------------------------------------------------------------------------------------------------------------------------------------------------------------------------------------------------------------------------------------------------------------------------------------------------------------------------------------------------------------------------------------------------------------------------------------------------------------------------------------------------------------------------------------------------------------------------------------------------------------------------------------------------------------------------------------------------------------------------------------------------------------------------------------------------------------------------------|
| Bias due to confounding                          | Moderate  | <ul style="list-style-type: none"> <li>• Major geographical regions included as covariate in multivariable models to address residual confounding due to geographic progression of the pandemic from continent to continent over time, which could be correlated with exposure.</li> <li>• Implementation of public health interventions may have been temporarily associated with an increase in testing activities during the follow-up period. This likely has happened only in a small number of geopolitical areas as availability of tests was limited globally during our study period and would have biased estimates slightly towards the null.</li> <li>• Temporal clustering of implementation of public health interventions with a relatively low number of geopolitical areas with implementation before or during exposure period. Inability to determine the association of epidemic growth with school closures independent of the remaining 2 public health interventions.</li> <li>• Estimates of association decreased in different multivariable models, but strong evidence against the null hypothesis remained.</li> </ul> |
| Bias in selection of participants into the study | Low       | <ul style="list-style-type: none"> <li>• Prespecified eligibility criteria.</li> <li>• All eligible geopolitical areas included.</li> </ul>                                                                                                                                                                                                                                                                                                                                                                                                                                                                                                                                                                                                                                                                                                                                                                                                                                                                                                                                                                                                        |
| Bias in classification of intervention           | Low       | <ul style="list-style-type: none"> <li>• Assessed at level of geopolitical area (states for United States and Australia, provinces for Canada, overseas territories, and countries for the rest of the world).</li> <li>• Representative for the analyzed geopolitical area.</li> </ul>                                                                                                                                                                                                                                                                                                                                                                                                                                                                                                                                                                                                                                                                                                                                                                                                                                                            |
| Bias due to deviations from intervention         | Low       | <ul style="list-style-type: none"> <li>• Deviations from interventions could not be assessed across geopolitical areas.</li> <li>• Deviations would bias estimates towards the null.</li> </ul>                                                                                                                                                                                                                                                                                                                                                                                                                                                                                                                                                                                                                                                                                                                                                                                                                                                                                                                                                    |
| Bias due to missing data                         | Low       | <ul style="list-style-type: none"> <li>• No missing data.</li> </ul>                                                                                                                                                                                                                                                                                                                                                                                                                                                                                                                                                                                                                                                                                                                                                                                                                                                                                                                                                                                                                                                                               |
| Bias in measurement of outcome                   | Low       | <ul style="list-style-type: none"> <li>• Rate ratio derived from cumulative incidences of confirmed COVID-19 cases at beginning and end of a one-week follow-up period.</li> <li>• Accounting for variation in testing strategies between geopolitical areas, as each area serves as its own reference when deriving rate ratios</li> <li>• Smoothing out estimates by averaging out the daily highs and lows over a longer period, decreasing the risk of non-differential misclassification.</li> </ul>                                                                                                                                                                                                                                                                                                                                                                                                                                                                                                                                                                                                                                          |
| Bias in selection of the reported result         | Low       | <ul style="list-style-type: none"> <li>• All analyses pre-specified in the protocol reported. Post-hoc analyses clearly specified.</li> </ul>                                                                                                                                                                                                                                                                                                                                                                                                                                                                                                                                                                                                                                                                                                                                                                                                                                                                                                                                                                                                      |

|         |          |                                                                                                                                                                       |
|---------|----------|-----------------------------------------------------------------------------------------------------------------------------------------------------------------------|
| Overall | Moderate | <ul style="list-style-type: none"> <li>• Moderate risk of bias due to confounding with other public health interventions (more likely away from the null).</li> </ul> |
|---------|----------|-----------------------------------------------------------------------------------------------------------------------------------------------------------------------|

---

Summary of risk of bias for non-randomized studies of exposures or interventions.<sup>1,2</sup>

**Table S23. Bias domains for association of epidemic growth with number of implemented public health interventions**

| Domain (social distancing)                       | Judgement | Explanation                                                                                                                                                                                                                                                                                                                                                                                                                                                                                                                                                                                                                                                                                                                                                                                                                                                                             |
|--------------------------------------------------|-----------|-----------------------------------------------------------------------------------------------------------------------------------------------------------------------------------------------------------------------------------------------------------------------------------------------------------------------------------------------------------------------------------------------------------------------------------------------------------------------------------------------------------------------------------------------------------------------------------------------------------------------------------------------------------------------------------------------------------------------------------------------------------------------------------------------------------------------------------------------------------------------------------------|
| Bias due to confounding                          | Low       | <ul style="list-style-type: none"> <li>• Major geographical regions included as covariate in multivariable models to address residual confounding due to geographic progression of the pandemic from continent to continent over time, which could be correlated with exposure.</li> <li>• Implementation of public health interventions may have been temporarily associated with an increase in testing activities during the follow-up period. This likely has happened only in a small number of geopolitical areas as availability of tests was limited globally during our study period and would have biased estimates slightly towards the null.</li> <li>• Estimates of association decreased in different multivariable models, but strong evidence against the null hypothesis remained.</li> <li>• Clear linear trend in log rate ratio in multivariable models.</li> </ul> |
| Bias in selection of participants into the study | Low       | <ul style="list-style-type: none"> <li>• Prespecified eligibility criteria.</li> <li>• All eligible geopolitical areas included.</li> </ul>                                                                                                                                                                                                                                                                                                                                                                                                                                                                                                                                                                                                                                                                                                                                             |
| Bias in classification of intervention           | Low       | <ul style="list-style-type: none"> <li>• Assessed at level of geopolitical area (states for United States and Australia, provinces for Canada, overseas territories, and countries for the rest of the world).</li> <li>• Representative for the analyzed geopolitical area.</li> </ul>                                                                                                                                                                                                                                                                                                                                                                                                                                                                                                                                                                                                 |
| Bias due to deviations from intervention         | Low       | <ul style="list-style-type: none"> <li>• Deviations from interventions could not be assessed across geopolitical areas.</li> <li>• Deviations would bias estimates towards the null.</li> </ul>                                                                                                                                                                                                                                                                                                                                                                                                                                                                                                                                                                                                                                                                                         |
| Bias due to missing data                         | Low       | <ul style="list-style-type: none"> <li>• No missing data.</li> </ul>                                                                                                                                                                                                                                                                                                                                                                                                                                                                                                                                                                                                                                                                                                                                                                                                                    |
| Bias in measurement of outcome                   | Low       | <ul style="list-style-type: none"> <li>• Rate ratio derived from cumulative incidences of confirmed COVID-19 cases at beginning and end of a one-week follow-up period.</li> <li>• Accounting for variation in testing strategies between geopolitical areas, as each area serves as its own reference when deriving rate ratios</li> <li>• Smoothing out estimates by averaging out the daily highs and lows over a longer period, decreasing the risk of non-differential misclassification.</li> </ul>                                                                                                                                                                                                                                                                                                                                                                               |
| Bias in selection of the reported result         | Low       | <ul style="list-style-type: none"> <li>• All analyses pre-specified in the protocol reported. Post-hoc analyses clearly specified.</li> </ul>                                                                                                                                                                                                                                                                                                                                                                                                                                                                                                                                                                                                                                                                                                                                           |
| Overall                                          | Low       | <ul style="list-style-type: none"> <li>• All domains judged to be at low risk of bias</li> </ul>                                                                                                                                                                                                                                                                                                                                                                                                                                                                                                                                                                                                                                                                                                                                                                                        |

Summary of risk of bias for non-randomized studies of exposures or interventions.<sup>1,2</sup>

### III. Supplementary Figures

Figure S1. Calculation of rate ratios

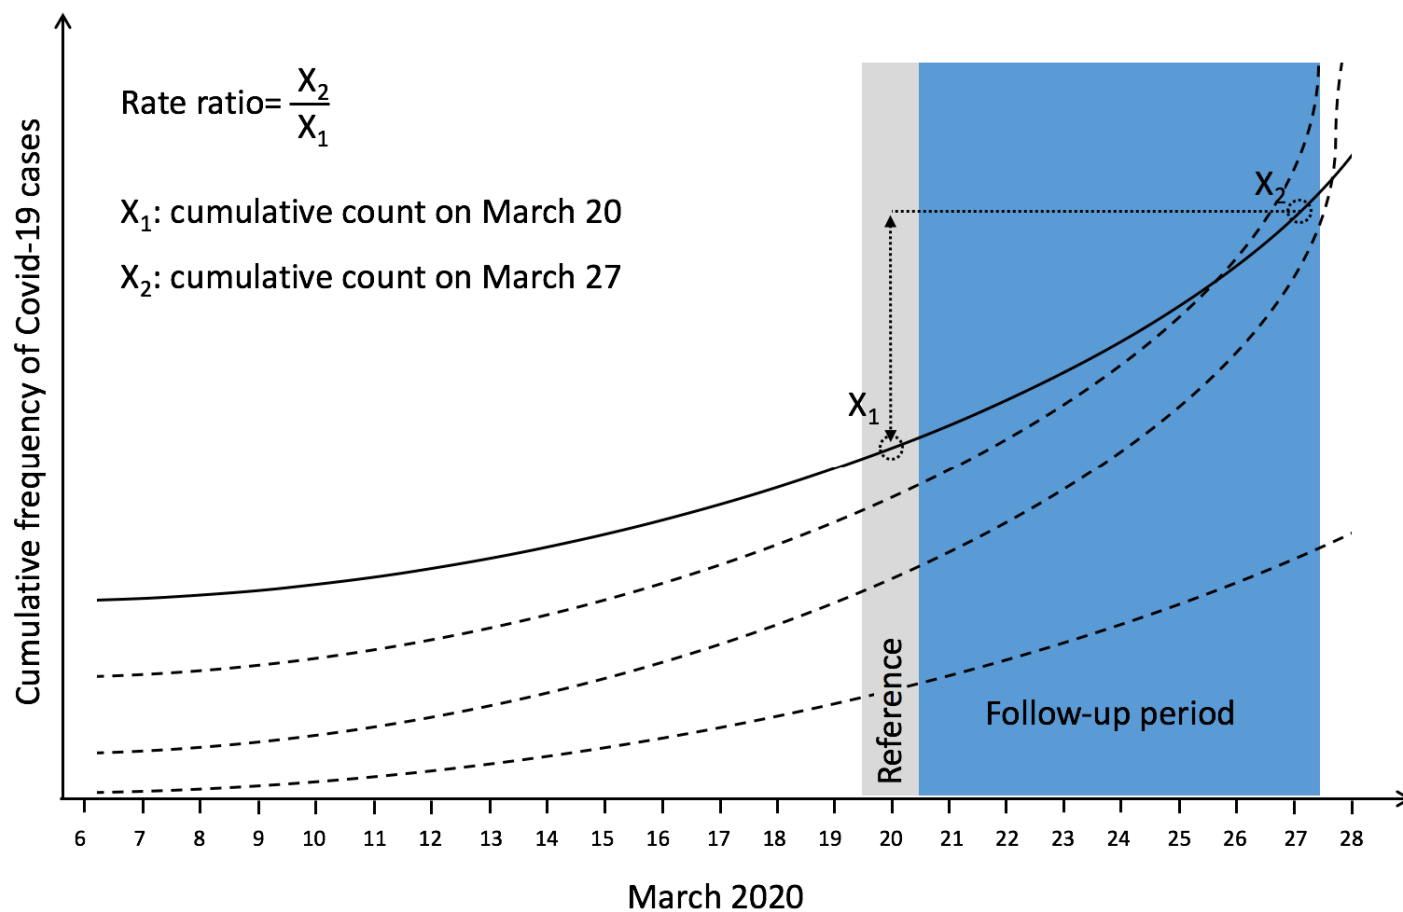

Calculation of rate ratios. Curves are cumulative frequency curves. Rate ratio calculated as the cumulative count of confirmed cases since the beginning of the epidemic as of March 27 divided by the cumulative count of confirmed cases since the beginning of the epidemic as of March 20. A rate ratio of 2 indicates, for example, that the count of confirmed cases in a geopolitical area has doubled within one week.

Figure S2. Cluster analysis

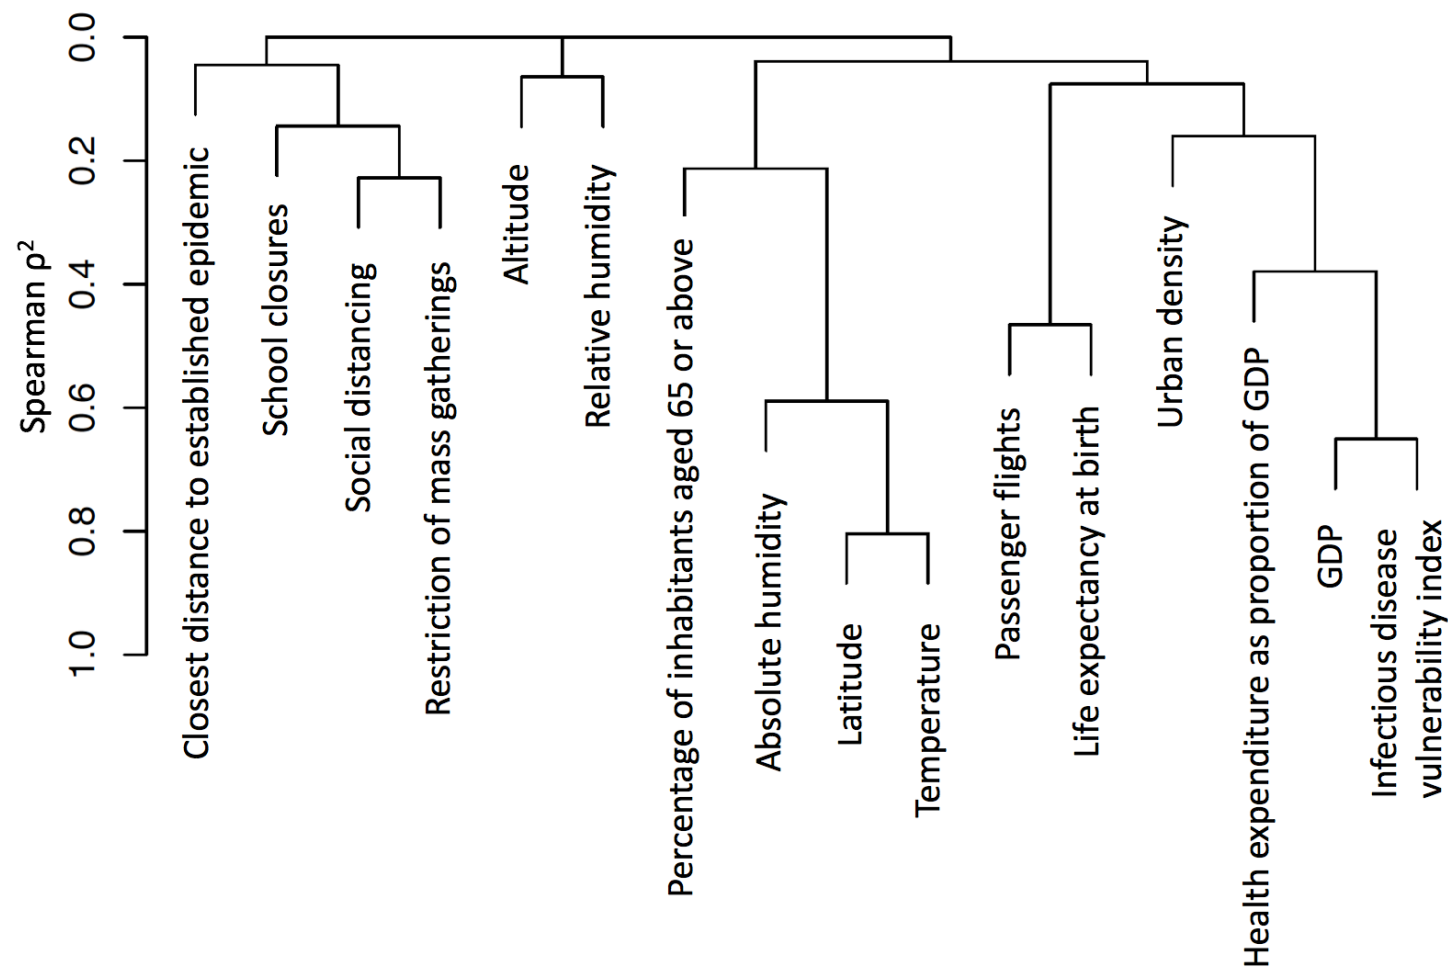

Cluster analysis based on Spearman's  $\rho^2$ .

**Figure S3. Flowchart**

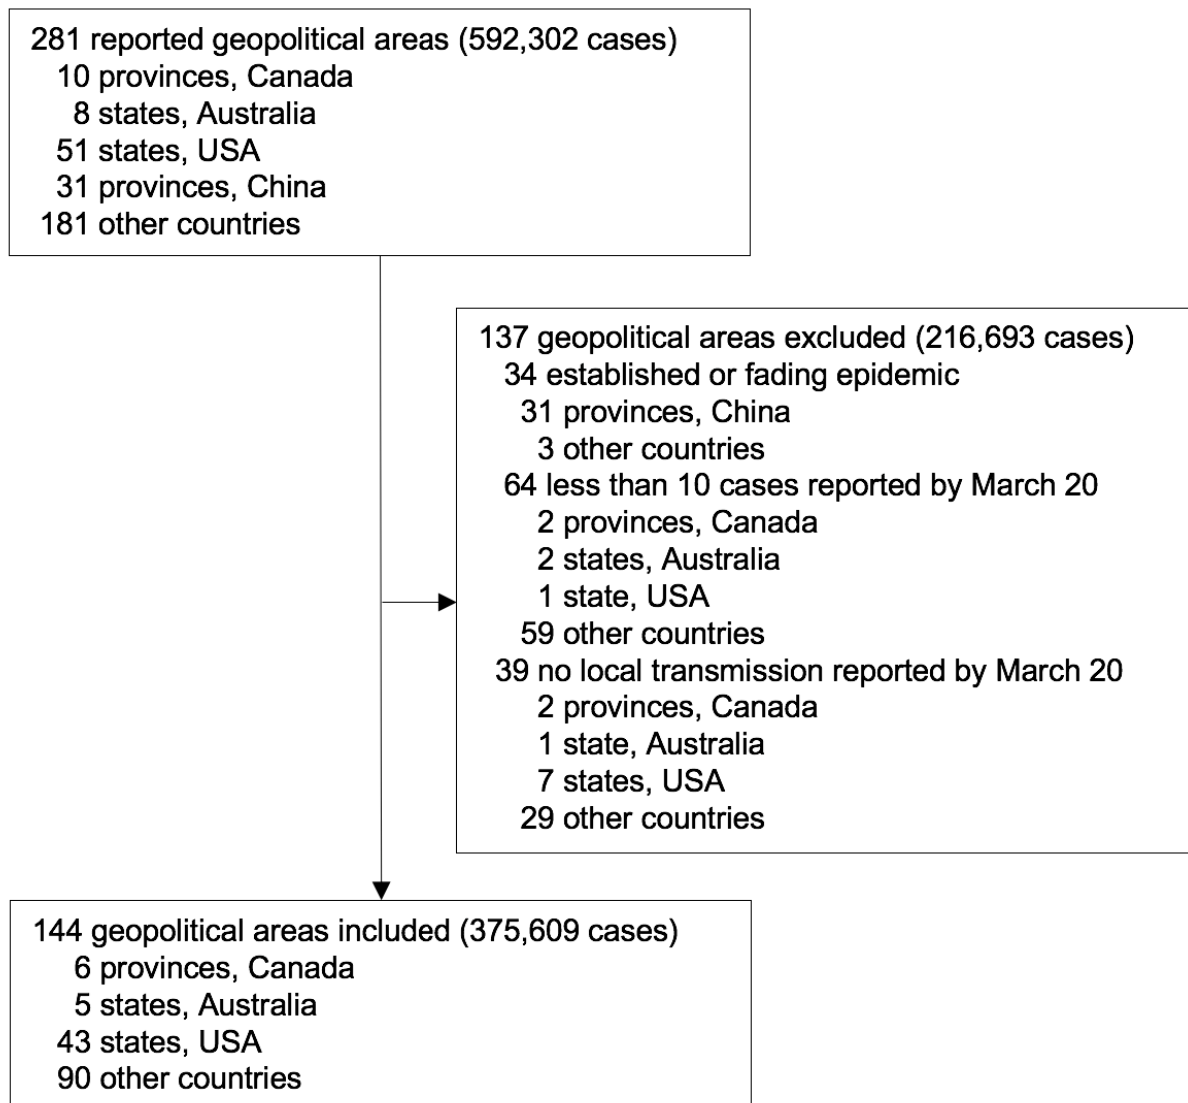

Figure S4. Scatter plot of temperature against latitude

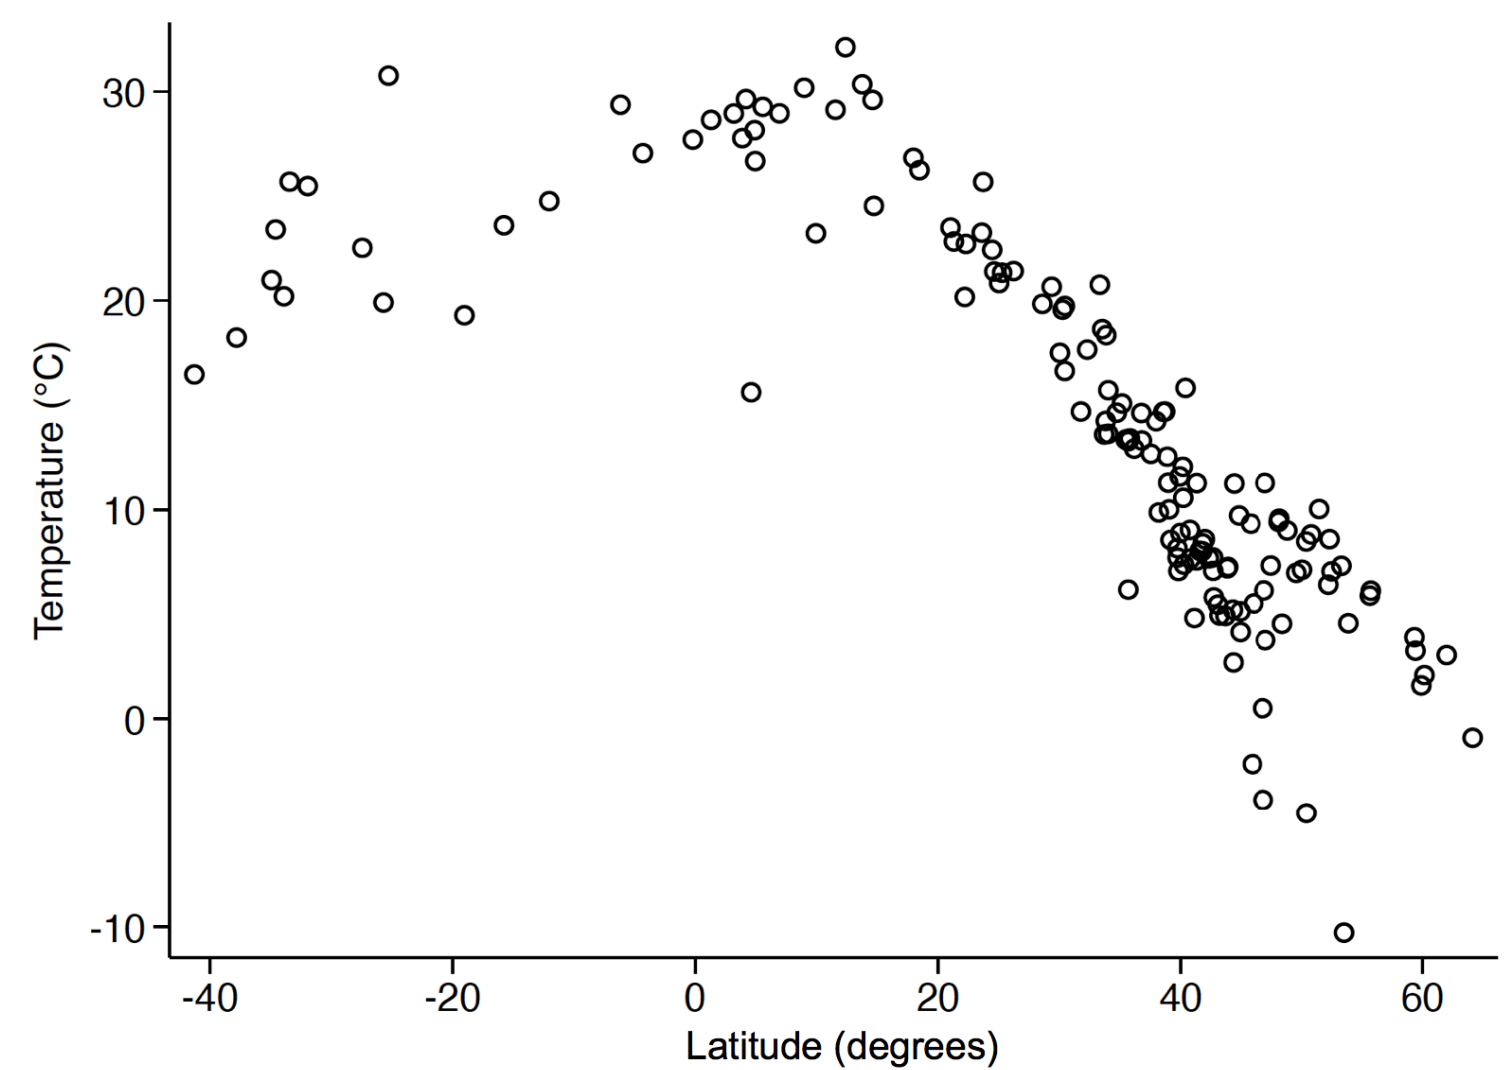

Scatter plot of temperature against latitude for 144 geopolitical areas. As latitude moves further away from the equator temperature decreases.



Figure S5. Scatter plot of absolute humidity against latitude

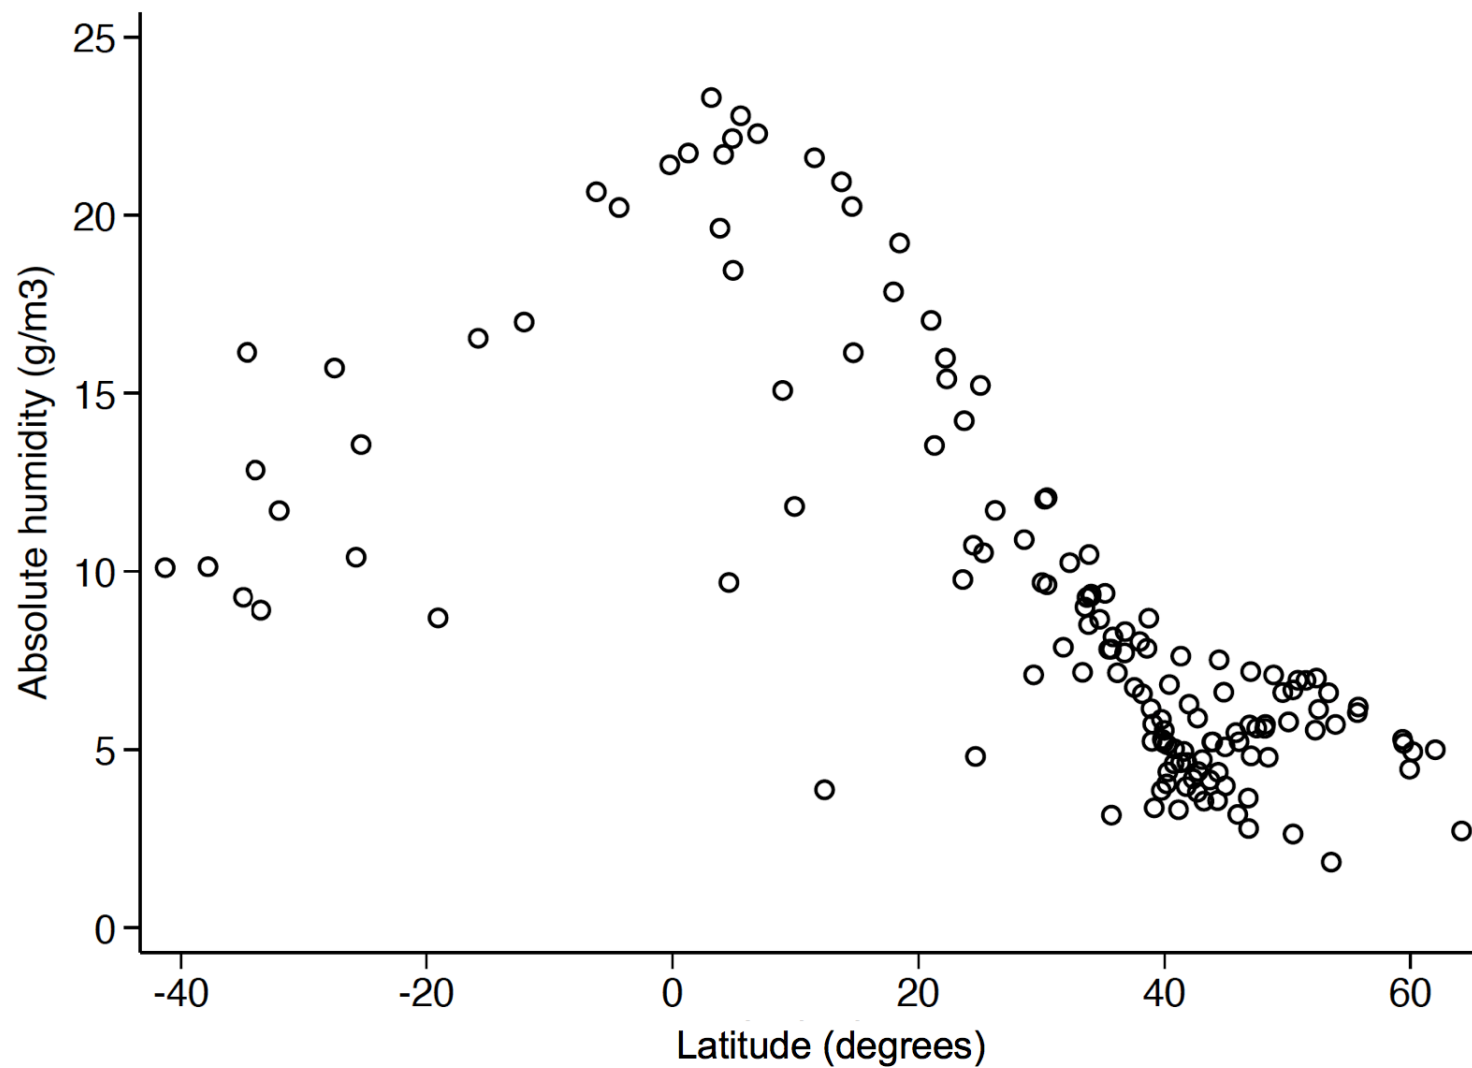

Scatter plot of absolute humidity against latitude for 144 geopolitical areas. As latitude moves further away from the equator absolute humidity decreases.

Figure S6. Scatter plot of relative humidity against latitude

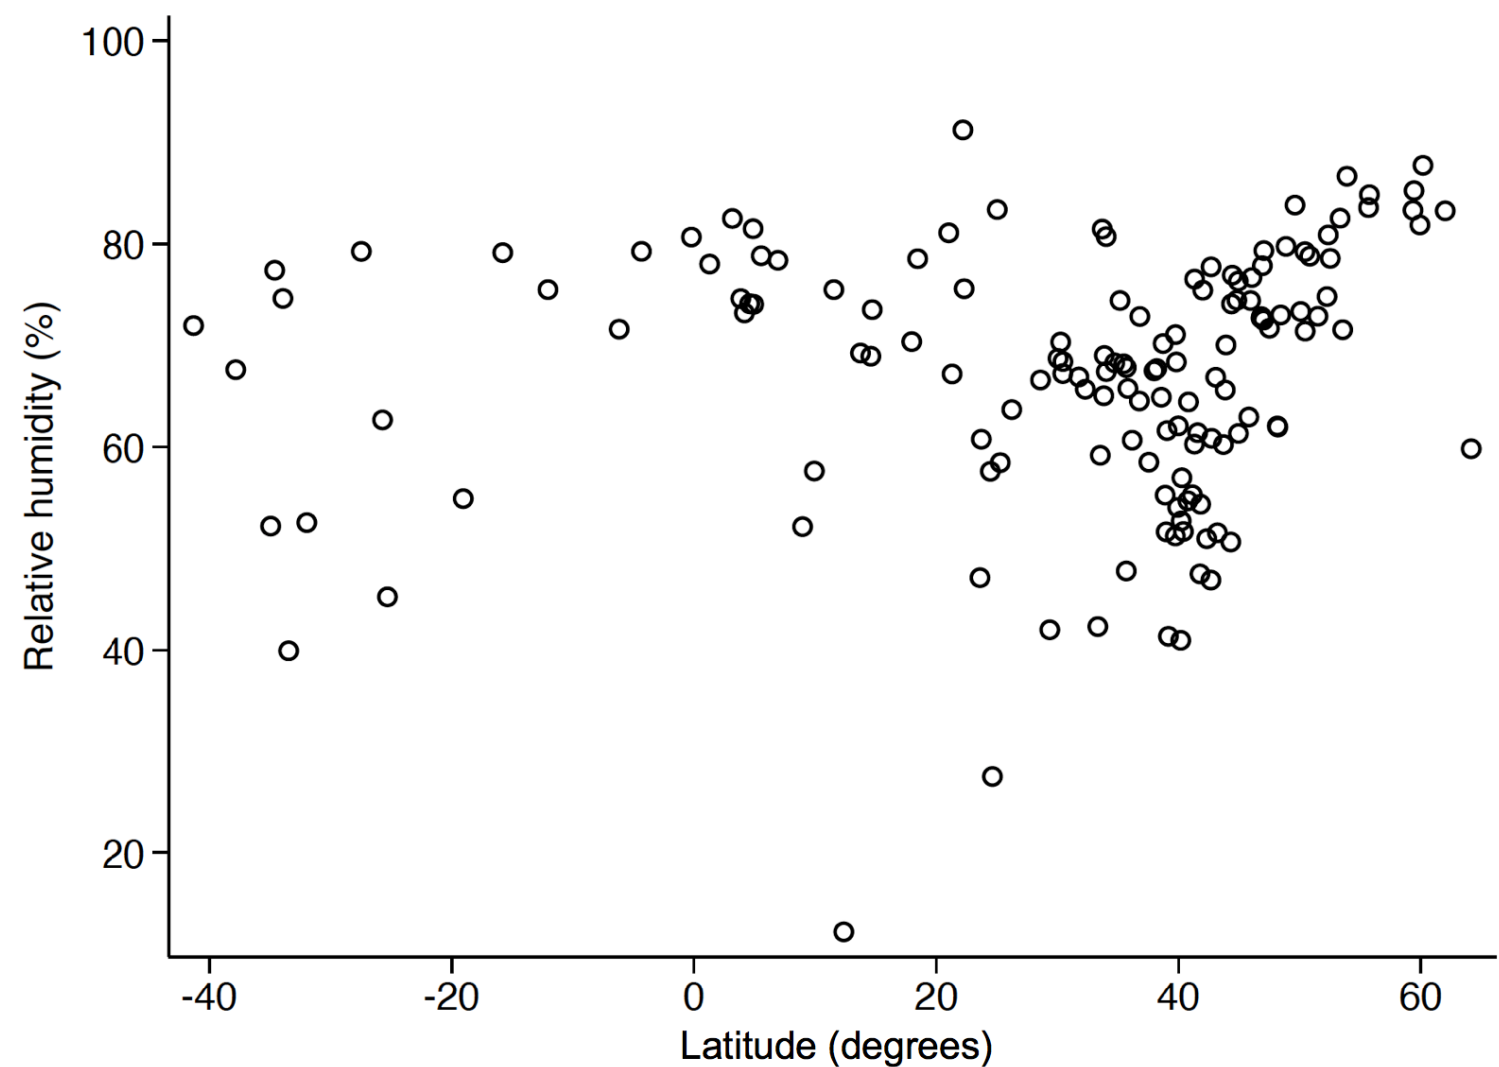

Scatter plot of relative humidity against latitude for 144 geopolitical areas. There is no apparent association between relative humidity and latitude.

**Figure S7. Bubble plot of epidemic growth against latitude**

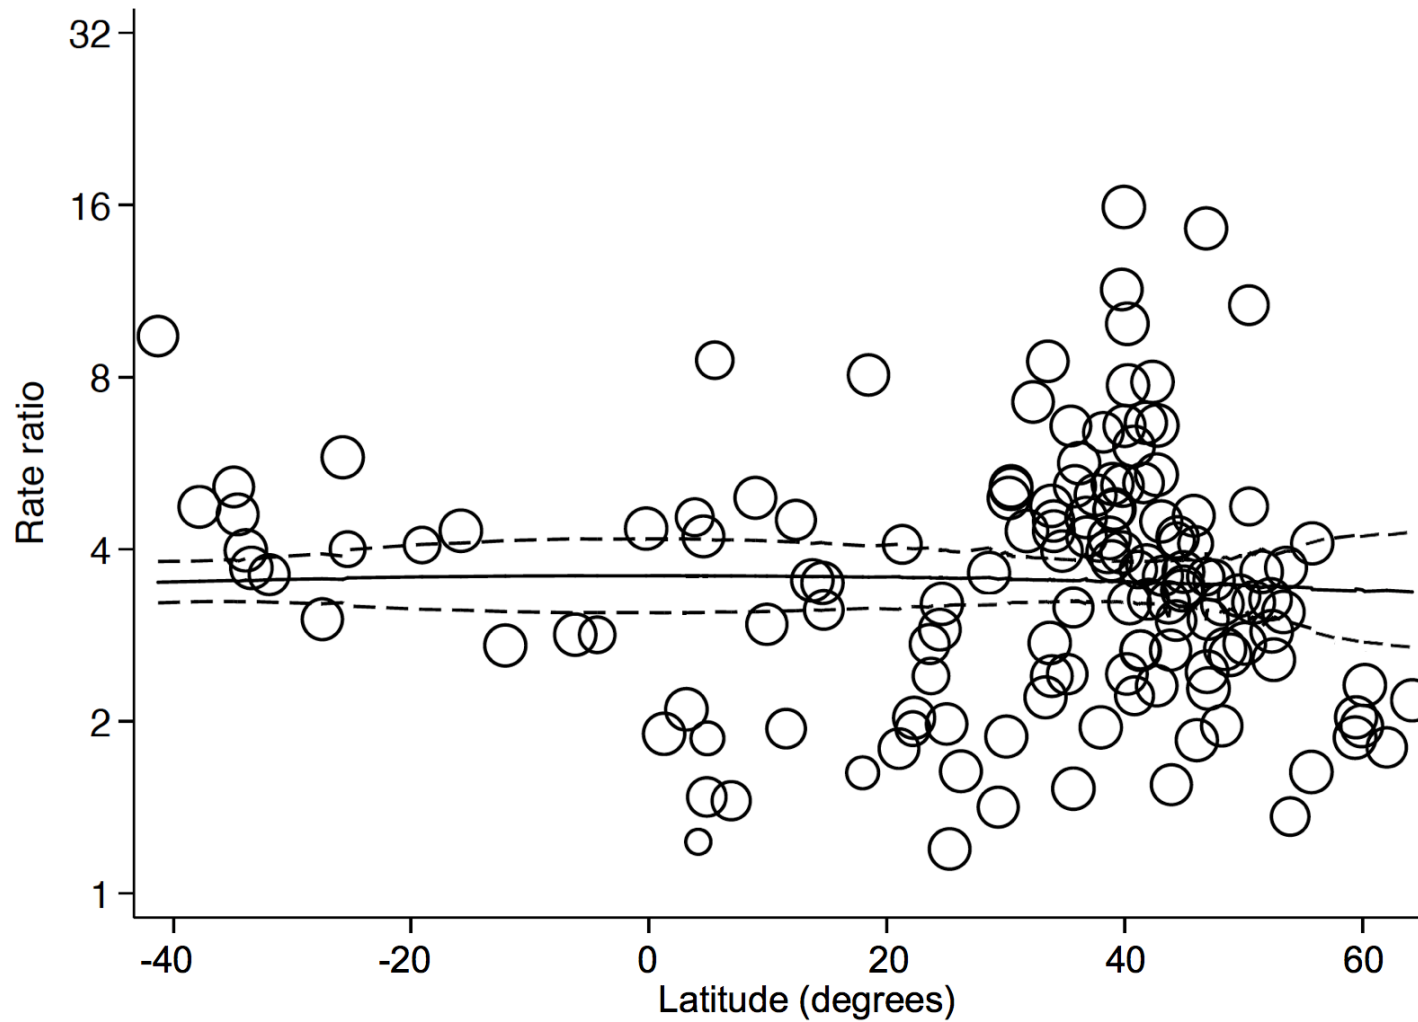

Each bubble represents a geopolitical area ( $n=144$ ), with the size of the bubble proportional to the weight of the geopolitical area in weighted random-effects regression. Prediction line and 95% confidence band are for the univariate association of epidemic growth with latitude squared (i.e. a quadratic relationship) from random-effects regression with inverse-variance weights

**Figure S8. Bubble plot of epidemic growth against temperature**

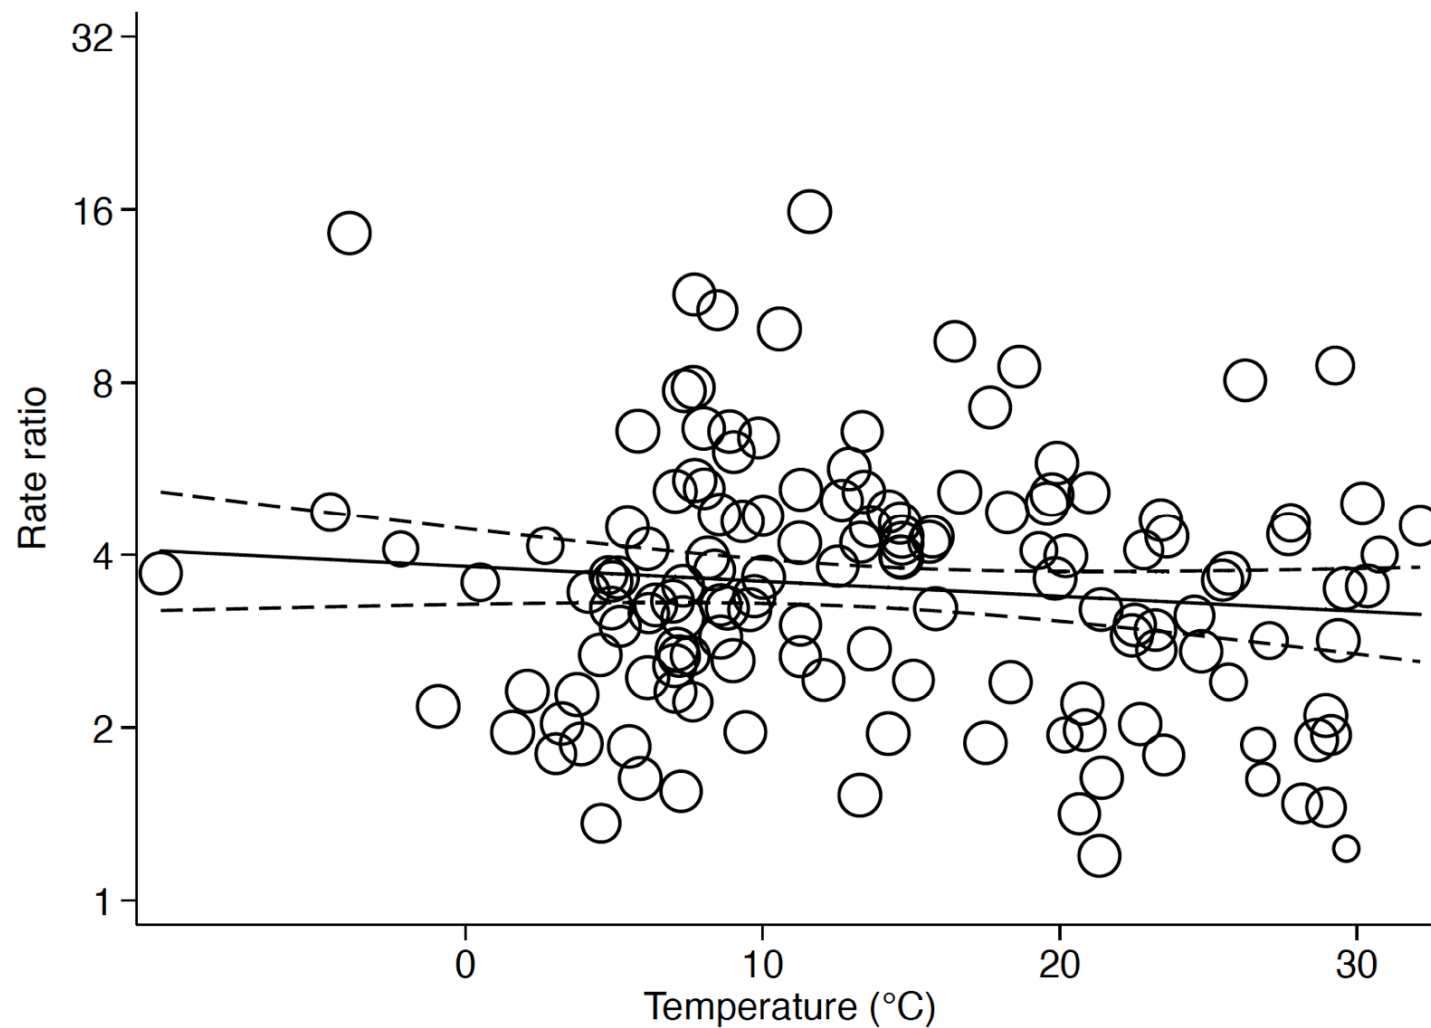

Each bubble represents a geopolitical area ( $n=144$ ), with the size of the bubble proportional to the weight of the geopolitical area in weighted random-effects regression. Prediction line and 95% confidence band are for the univariate association of epidemic growth with temperature from random-effects regression with inverse-variance weights.

**Figure S9. Bubble plot of epidemic growth against relative humidity**

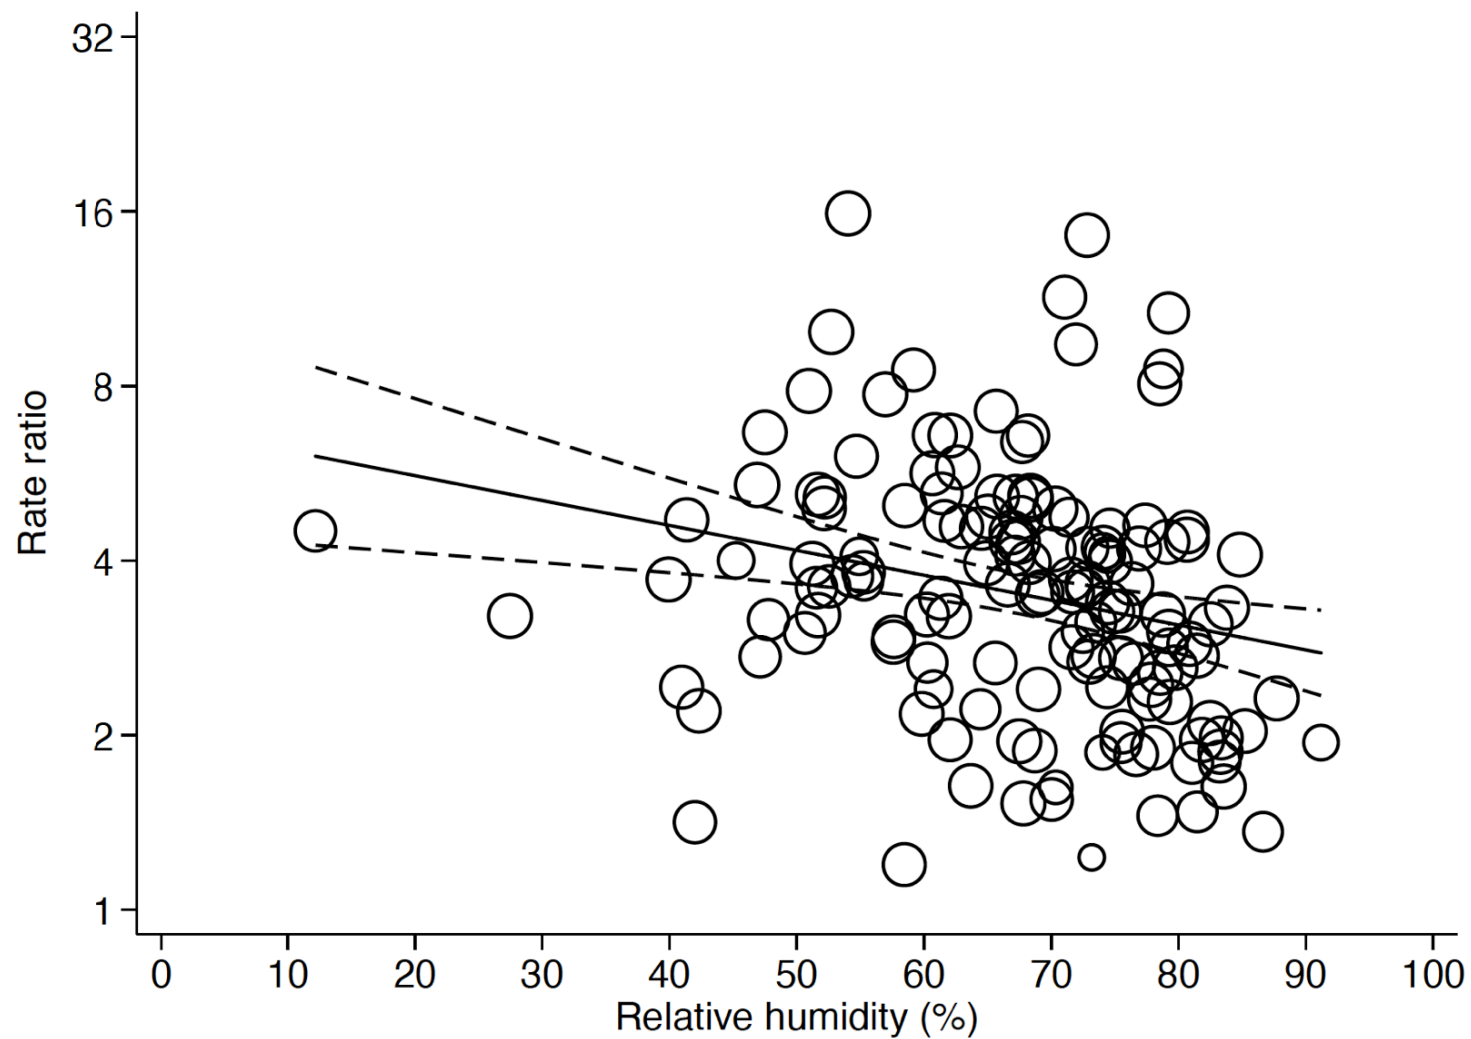

Each bubble represents a geopolitical area (n=144), with the size of the bubble proportional to the weight of the geopolitical area in weighted random-effects regression. Prediction line and 95% confidence band are for the univariate association of epidemic growth with relative humidity from random-effects regression with inverse-variance weights.

**Figure S10. Bubble plot of epidemic growth against absolute humidity**

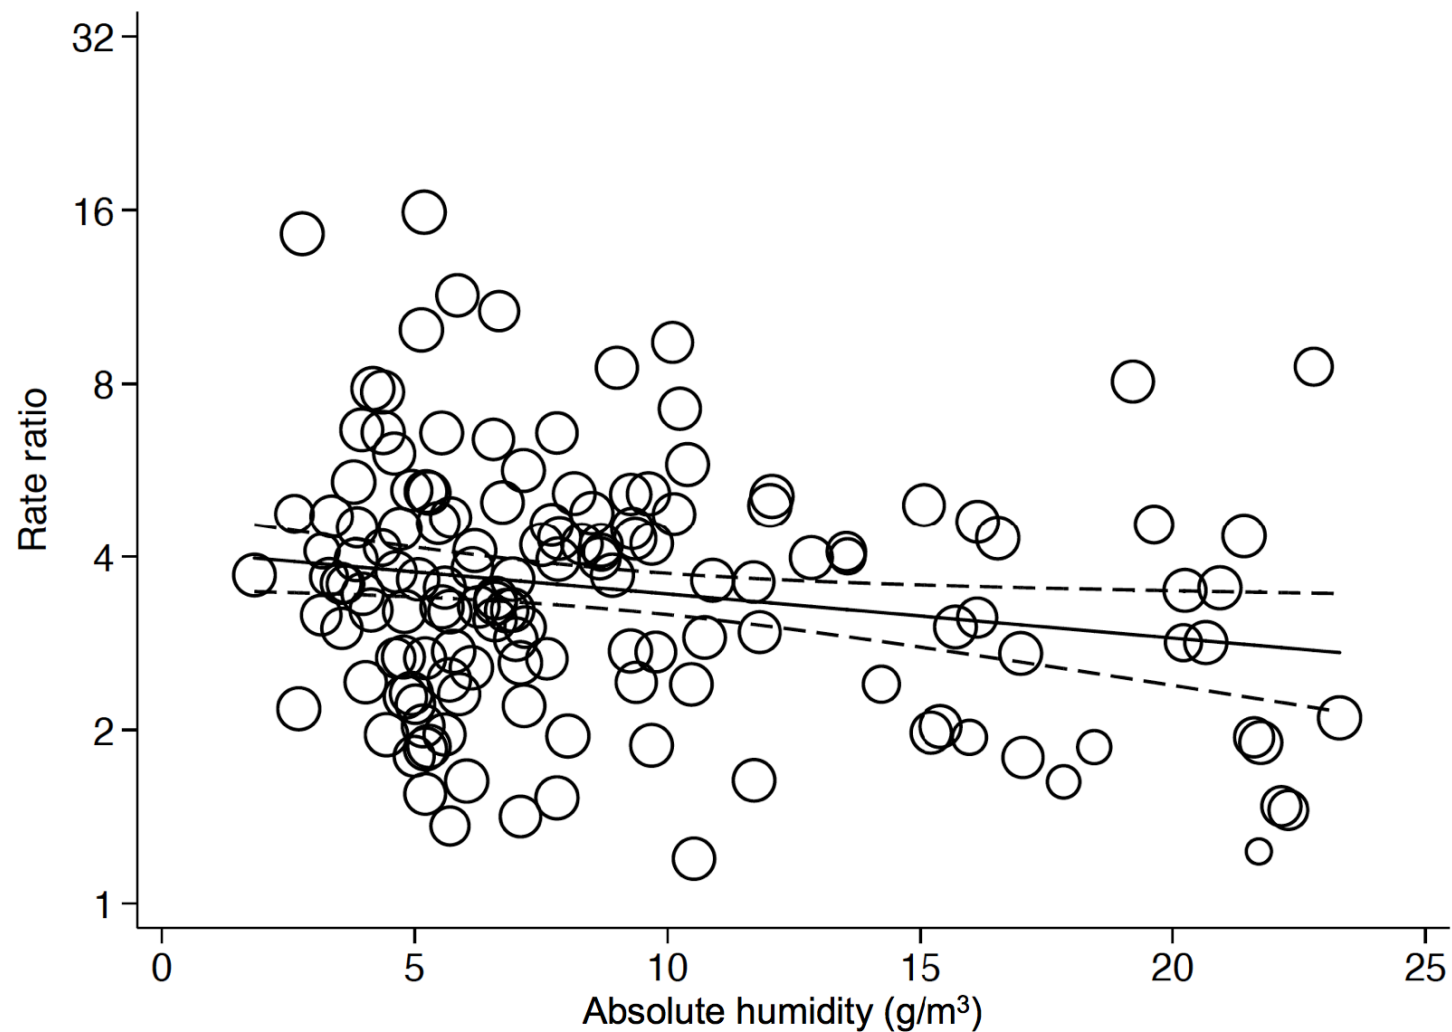

Each bubble represents a geopolitical area ( $n=144$ ), with the size of the bubble proportional to the weight of the geopolitical area in weighted random-effects regression. Prediction line and 95% confidence band are for the univariate association of epidemic growth with absolute humidity from random-effects regression with inverse-variance weights.

**Figure S11. Bubble plot of epidemic growth by restrictions of mass gatherings (no/yes)**

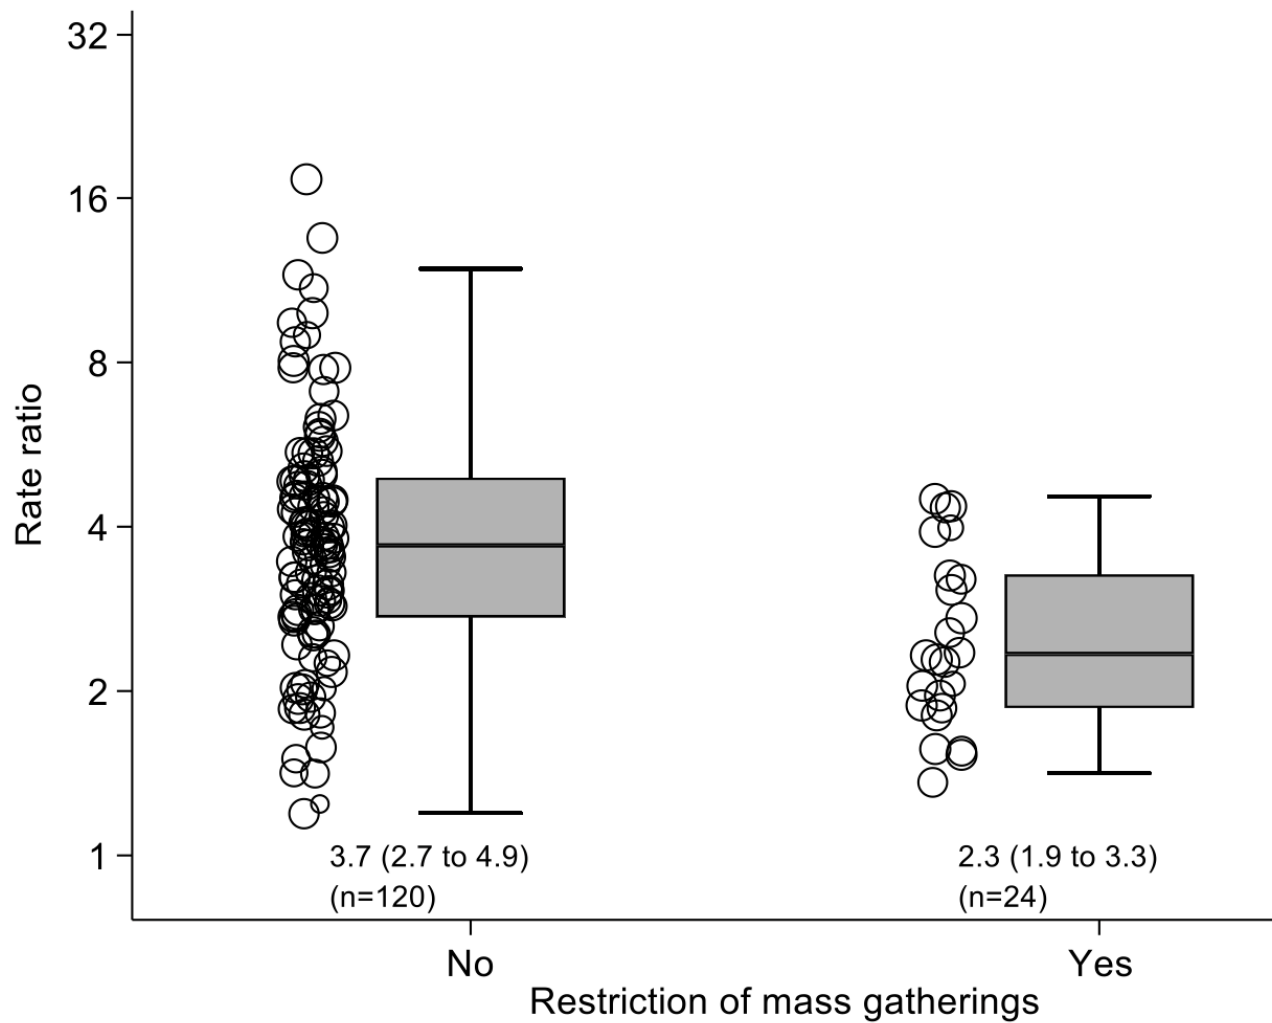

Each bubble represents a geopolitical area, with the size of the bubble proportional to the weight of the geopolitical area in weighted random-effects regression with inverse-variance weights. Box and whisker plots, with the box representing median and interquartile range, whiskers the most extreme values within 1.5 times of the interquartile range beyond the 25th and 75th percentile.

**Figure S12. Bubble plot of epidemic growth by school closures (no/yes)**

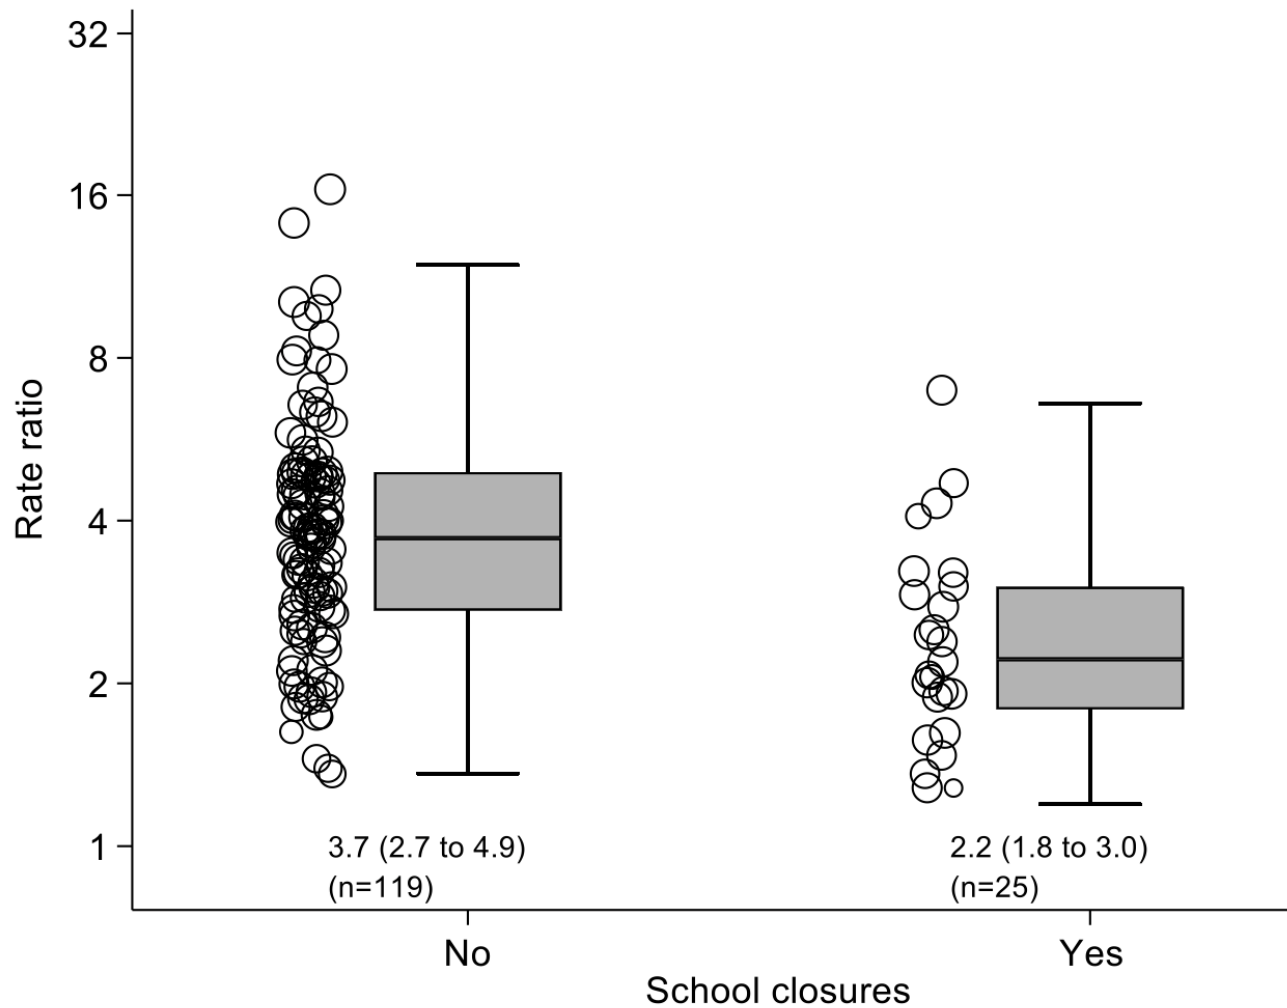

Each bubble represents a geopolitical area, with the size of the bubble proportional to the weight of the geopolitical area in weighted random-effects regression with inverse-variance weights. Box and whisker plots, with the box representing median and interquartile range, whiskers the most extreme values within 1.5 times of the interquartile range beyond the 25th and 75th percentile.



**Figure S13. Bubble plot of epidemic growth by measures of social distancing (no/yes)**

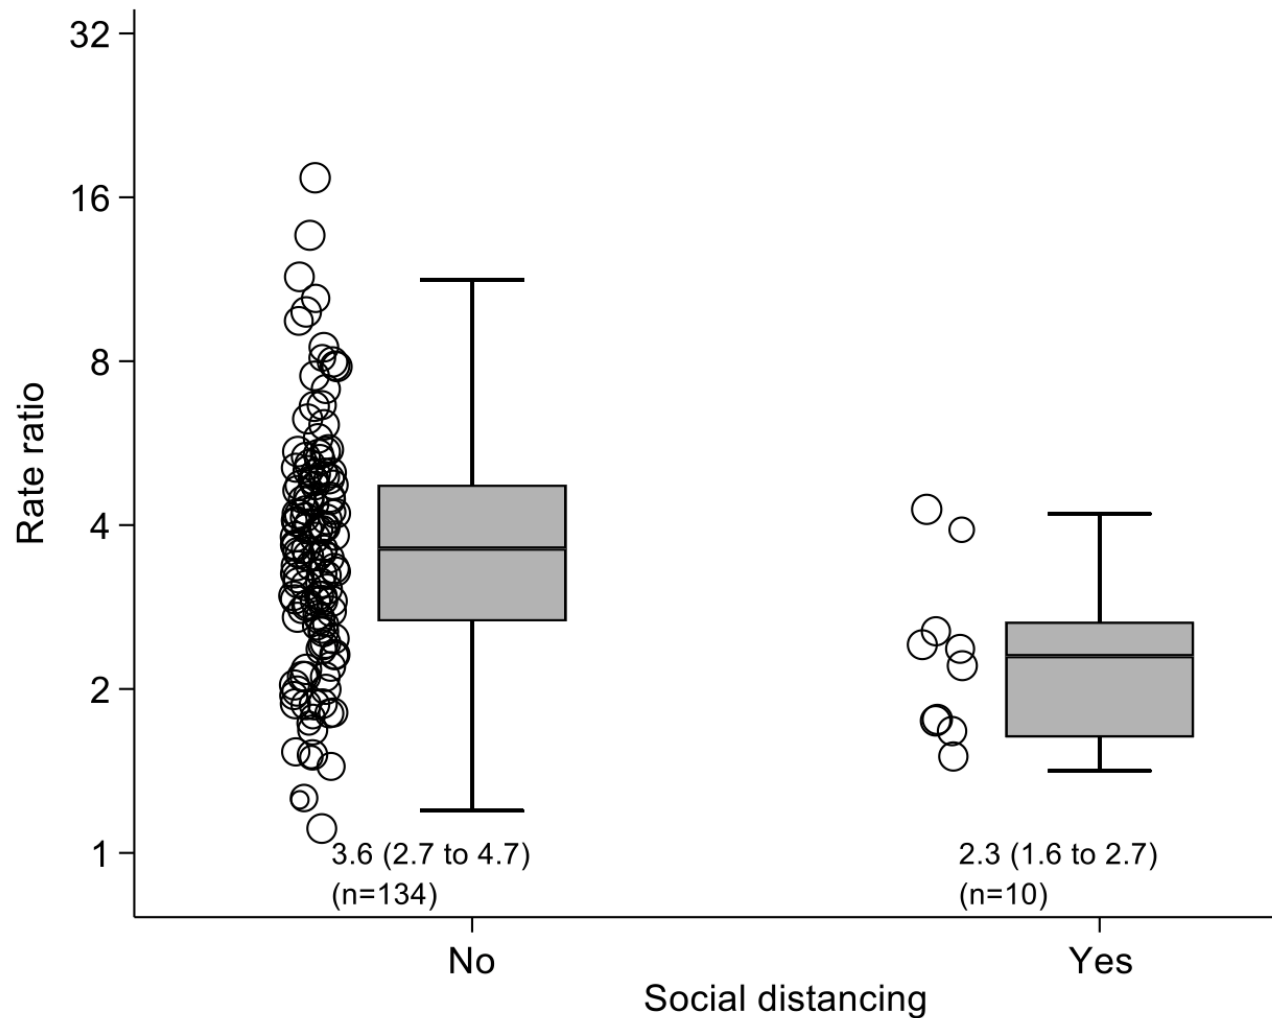

Each bubble represents a geopolitical area, with the size of the bubble proportional to the weight of the geopolitical area in weighted random-effects regression with inverse-variance weights. Box and whisker plots, with the box representing median and interquartile range, whiskers the most extreme values within 1.5 times of the interquartile range beyond the 25th and 75th percentile.

**Figure S14. Multivariable model after stepwise backward selection of covariates**

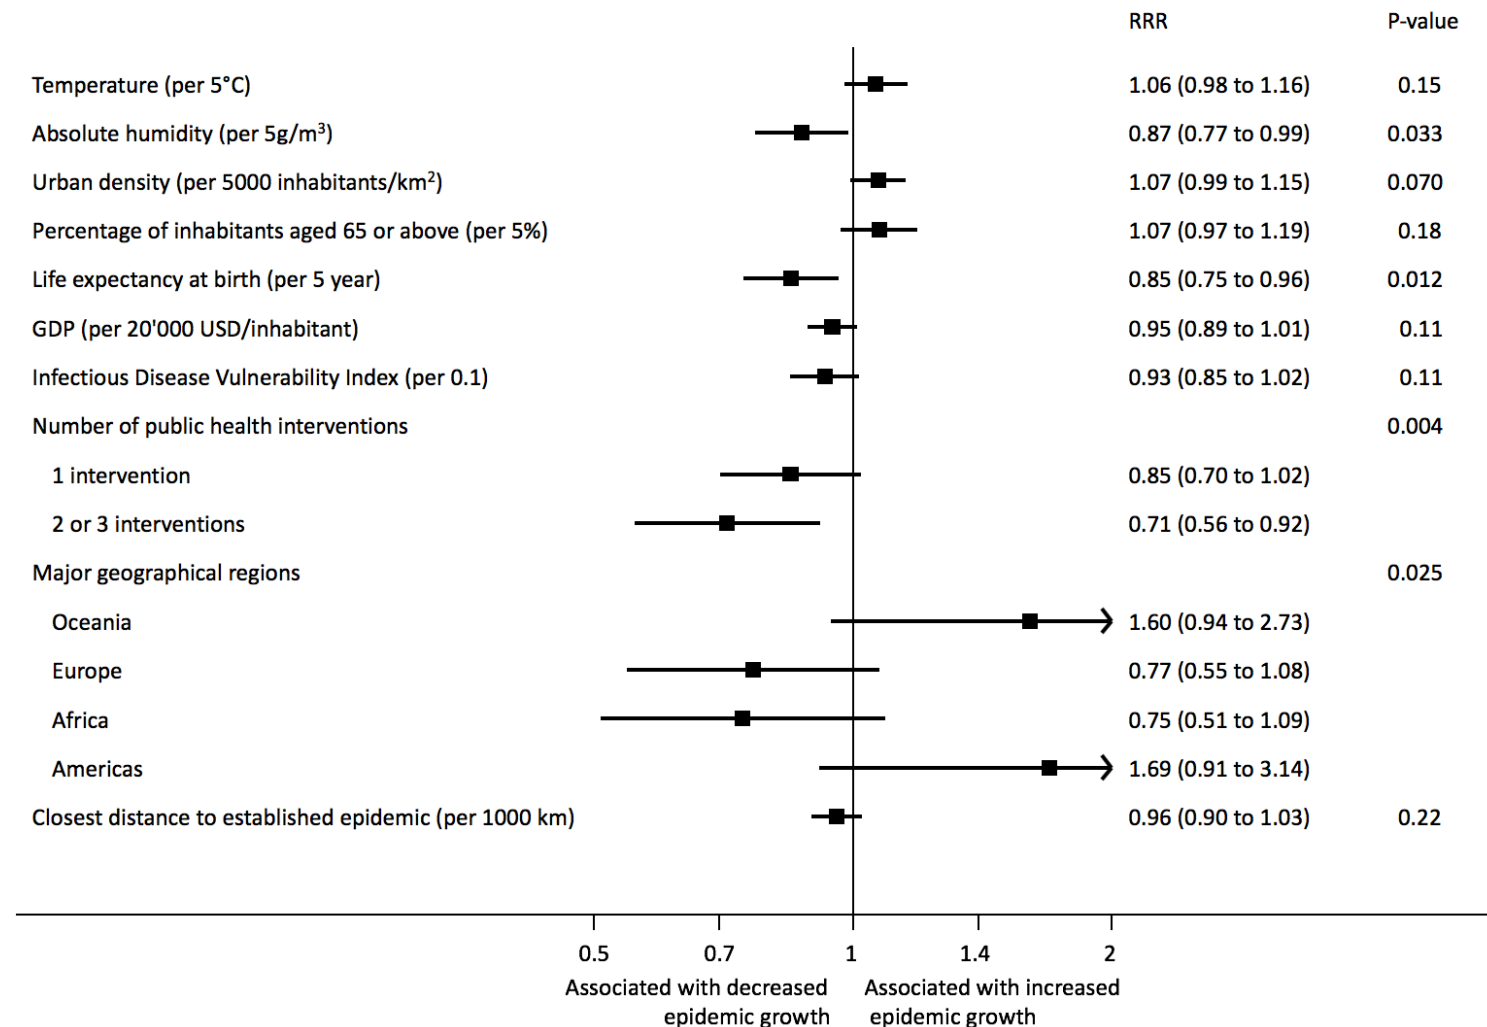

Caterpillar plot of multivariable model after stepwise backward selection of covariates. The vertical line represents no association between the covariates and the epidemic growth. Each covariate is expressed as Ratio of rate ratios (RRR). Reference categories are no public health intervention for Number of public health interventions, and Asia for Major geographical regions.

**Figure S15. Risk of bias summary table for evaluated exposure variables**

|                                       | Bias due to confounding | Bias in selection of participants | Bias in classification of exposure | Bias due to deviations from exposure | Bias due to missing data | Bias in measurement of outcome | Bias in selection of the reported result | Overall |
|---------------------------------------|-------------------------|-----------------------------------|------------------------------------|--------------------------------------|--------------------------|--------------------------------|------------------------------------------|---------|
| Latitude                              | ●                       | ●                                 | ●                                  | ●                                    | ●                        | ●                              | ●                                        | ●       |
| Temperature                           | ●                       | ●                                 | ●                                  | ●                                    | ●                        | ●                              | ●                                        | ●       |
| Relative humidity                     | ●                       | ●                                 | ●                                  | ●                                    | ●                        | ●                              | ●                                        | ●       |
| Absolute humidity                     | ●                       | ●                                 | ●                                  | ●                                    | ●                        | ●                              | ●                                        | ●       |
| Any public health intervention        | ●                       | ●                                 | ●                                  | ●                                    | ●                        | ●                              | ●                                        | ●       |
| Restriction of mass gatherings        | ●                       | ●                                 | ●                                  | ●                                    | ●                        | ●                              | ●                                        | ●       |
| Social distancing                     | ●                       | ●                                 | ●                                  | ●                                    | ●                        | ●                              | ●                                        | ●       |
| School closures                       | ●                       | ●                                 | ●                                  | ●                                    | ●                        | ●                              | ●                                        | ●       |
| Number of public health interventions | ●                       | ●                                 | ●                                  | ●                                    | ●                        | ●                              | ●                                        | ●       |

Summary of risk of bias for non-randomized studies of exposures or interventions.<sup>1,2</sup>

● Low risk of bias; ● Moderate risk of bias.

## IV. Supplementary References

1. Sterne JA, Hernán MA, Reeves BC, et al. ROBINS-I: a tool for assessing risk of bias in non-randomised studies of interventions. *BMJ* 2016;355:i4919.
2. Morgan RL, Thayer KA, Santesso N, et al. Evaluation of the risk of bias in non-randomized studies of interventions (ROBINS-I) and the 'target experiment' concept in studies of exposures: Rationale and preliminary instrument development. *Environ Int* 2018;120:382–7.
3. Dong E, Du H, Gardner L. An interactive web-based dashboard to track COVID-19 in real time. *Lancet Infect Dis* 2020;20(5):533–4.
4. Raspisaniye Pogodi. Weather for 243 countries of the world [Internet]. 2020 [cited 2020 Mar 14]. Available from: <https://rp5.ru/>
5. Peci A, Winter A-L, Li Y, et al. Effects of absolute humidity, relative humidity, temperature, and wind speed on influenza activity in Toronto, Ontario, Canada. *Appl Environ Microbiol* 2019;85(6):e02426-18, /aem/85/6/AEM.02426-18.atom.
6. UNESCO. COVID-19 Educational Disruption and Response [Internet]. 2020 [cited 2020 Mar 14]. Available from: <https://en.unesco.org/covid19/educationresponse>
7. World Bank. World Development Indicators [Internet]. The World Bank Group; 2020 [cited 2020 Mar 9]. Available from: <https://data.worldbank.org/>
8. Moore M, Gelfeld B, Okunogbe A, Christopher P. Identifying future disease hot spots: Infectious Disease Vulnerability Index [Internet]. Rand Corporation; 2016. Available from: [https://www.rand.org/pubs/research\\_reports/RR1605.html](https://www.rand.org/pubs/research_reports/RR1605.html)
9. Cox W. Demographia World Urban Areas [Internet]. 15th ed. 2019 [cited 2020 Mar 12]. Available from: <http://www.demographia.com/db-worldua.pdf>
10. United States Census Bureau [Internet]. [cited 2020 Mar 12]. Available from: <https://www.census.gov/>
11. CAPA - Centre for Aviation [Internet]. [cited 2020 Mar 12]. Available from: <https://centreforaviation.com/>
12. Annual World Airport Traffic Report, 2019 [Internet]. [cited 2020 Mar 12]. Available from: <https://store.aci.aero/product/annual-world-airport-traffic-report-2019/>
13. Federal Aviation Administration [Internet]. [cited 2020 Mar 12]. Available from: <https://www.faa.gov/>
